# Supplementary material for: Novel Strategy for Non-Aqueous Bioconjugation of Substituted Phenyl-1,2,4-triazole-3,5-dione Analogues
Source: MDPI journal article supplement (doi:10.3390/molecules27196667), 2022-10-07
Supplement: s1 [file s1]

## Supplementary Information

# Novel strategy for non-aqueous bioconjugation of substituted Phenyl-1,2,4-triazole-3,5-dione analogues

Hugh G. Hiscocks <sup>1</sup>, Alison T. Ung <sup>1</sup>, and Giancarlo Pascali <sup>2\*</sup>

<sup>1</sup>School of Mathematical and Physical Sciences, Faculty of Science, University of Technology Sydney, Broadway, NSW 2007, Australia

<sup>2</sup>School of Chemistry, University of New South Wales, Kensington, NSW 2052, Australia

<sup>3</sup>Prince of Wales Hospital, Nuclear Medicine and PET, Randwick, NSW 2031, Australia

<sup>4</sup>National Imaging Facility, University of New South Wales, Kensington, NSW 2052, Australia

\*Correspondence: G.pascali@unsw.au

| Table of contents                                                                                             | Page  |
|---------------------------------------------------------------------------------------------------------------|-------|
| Table S1                                                                                                      | 2     |
| Table S2                                                                                                      | 2     |
| General procedure for the synthesis of N-({phenyl carbamoyl}amino)ethoxyformamide derivatives ( <b>3a-f</b> ) | 2     |
| Spectral data of compounds <b>3a-f</b>                                                                        | 2-4   |
| General procedure for synthesis of phenyl-1,2,4-triazolidine-3,5-dione's derivatives ( <b>4a-f</b> )          | 4     |
| Spectral data of compounds <b>4a-f</b>                                                                        | 4-6   |
| Chromatograms Figures S1-S6                                                                                   | 6-8   |
| Table S3 and Figure S7                                                                                        | 9     |
| NMR spectra of new compounds <b>6a-f</b>                                                                      | 10-24 |

**Table S1:** Isolated yields of N-({phenyl carbamoyl}amino)ethoxyformamide derivatives (**3a-f**)

| <b>3</b> | <b>R =</b>      | <b>Yield (%)</b> |
|----------|-----------------|------------------|
| <b>a</b> | SF <sub>5</sub> | 88               |
| <b>b</b> | CF <sub>3</sub> | 78               |
| <b>c</b> | F               | 79               |
| <b>d</b> | H               | 81               |
| <b>e</b> | Me              | 51               |
| <b>f</b> | OMe             | 43               |

**Table S2:** Isolated yields of N-phenyl-1,2,4-triazolidine-3,5-dione derivatives (**4a-f**)

| <b>4</b> | <b>R =</b>      | <b>Yield (%)</b> |
|----------|-----------------|------------------|
| <b>a</b> | SF <sub>5</sub> | 90               |
| <b>b</b> | CF <sub>3</sub> | 82               |
| <b>c</b> | F               | 65               |
| <b>d</b> | H               | 78               |
| <b>e</b> | Me              | 73               |
| <b>f</b> | OMe             | 67               |

**General procedure for the synthesis of N-({phenyl carbamoyl}amino)ethoxyformamide derivatives (**3a-f**):**

1,1'-Carbonyldiimidazole (450 mg, 2.765 mmol) was suspended in anhydrous dichloromethane (10 mL) under nitrogen. The para substituted aniline (2 mmol) was added and the reaction mixture was refluxed at 50°C for 18 hr. Ethyl hydrazinecarboxylate (209 mg; 2 mmol) dropwise to the solution and the reaction was stirred at 50°C for 45 min and a further 2 hr under nitrogen flow. The precipitate was collected by vacuum filtration and washed with cold dichloromethane, the crude product was further dried *in vacuo*

***N*-({[4-(pentafluoro-λ<sup>6</sup>-sulfanyl)phenyl]carbamoyl}amino)ethoxyformamide (**3a**)**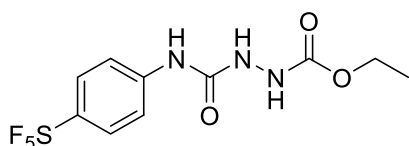

Compound **3a** was obtained as a white solid (620 mg, 1.78 mmol, 88%). Calcd for C<sub>10</sub>H<sub>13</sub>F<sub>5</sub>N<sub>3</sub>O<sub>3</sub>S [M+H]<sup>+</sup> 350.0597, [M+H]<sup>+</sup> Found 350.0592; <sup>1</sup>H-NMR (DMSO): δ 7.75 (d, J = 9.5 Hz, 2H), 7.65 (d, J = 8.5 Hz, 2H), 4.05 (q, J = 7, 14 Hz), 1.2 (t, J = 6.5 Hz) <sup>13</sup>C-NMR (DMSO): 157.05, 155.50, 146.22, 146.06, 143.43, 126.79, 117.98, 60.80, 14.71; <sup>19</sup>F-NMR (DMSO): δ 89.39 (q, J = 150.62, 1F), 64.20 (d, J = 150.62, Hz, 4F); IR (KBr): 3315 (w), 1703 (w), 1673 (w), 1565 (m), 1507 (w), 1237 (w), 1105 (w), 840 (m), 810 (s) cm<sup>-1</sup>

*N*-([4-(trifluoromethyl)phenyl]carbamoyl)amino)ethoxyformamide (**3b**)

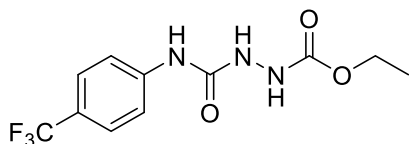

Compound **3b** was obtained as a white solid (462 mg, 1.59 mmol, 78%). **HRMS (EI)** Calcd for  $C_{11}H_{13}F_3N_3O_3$   $[M+H]^+$  292.0909,  $[M+H]^+$  Found 292.0903;  **$^1H$ -NMR (DMSO)**:  $\delta$  7.67 (br s, 2H), 7.59 (d, 2H,  $J = 10$  Hz);  **$^{13}C$ -NMR (DMSO)**:  $\delta$  156.91, 155.40, 143.55, 128.55, 125.92, 125.88, 123.23, 122.29, 121.98, 121.66, 121.34, 120.54, 118.15, 60.60, 14.53;  **$^{19}F$ -NMR (DMSO)**:  $\delta$  -60.13 (s); **IR (KBr)**: 3302 (w), 1701 (w), 1671 (w), 1612 (w), 1559 (w), 1509 (w), 1410 (w), 1325 (m), 1231 (m), 1159 (m), 1108 (s), 1067 (s), 1012 (w), 844 (s)  $cm^{-1}$

*N*-([4-fluorophenyl]carbamoyl)amino)ethoxyformamide (**3c**)

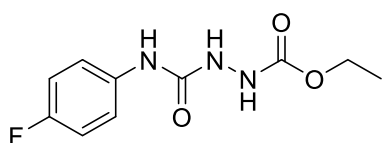

Compound **3c** was obtained as a white solid (382 mg, 1.59 mmol, 79%). **HRMS (EI)** Calcd for  $C_{10}H_{13}FN_3O_3$   $[M+H]^+$  242.0940,  $[M+H]^+$  Found 242.0938;  **$^1H$ -NMR (DMSO)**:  $\delta$  7.47 (d,  $J = 3.5$  Hz, 2H); 7.08 (d,  $J = 8.5$  Hz, 2H), 4.06 (q,  $J = 7, 14$  Hz, 2H), 1.19 (t,  $J = 7$  Hz, 3H);  **$^{13}C$ -NMR (DMSO)**:  $\delta$  158.48, 156.92, 156.13, 155.68, 152.70, 136.03, 136.01, 135.97, 120.23, 120.02, 119.94, 115.34, 115.12, 114.91, 60.49, 14.52;  **$^{19}F$ -NMR (DMSO)**:  $\delta$  -121.61; **IR (KBr)**: 3274 (s), 2983 (w), 1735 (s), 1682 (s), 1559 (s), 1505 (s), 1410 (w), 1320 (w), 1233 (s), 1207 (s), 1053 (w), 1023 (w), 848 (s), 788 (m)  $cm^{-1}$

*N*-([phenyl]carbamoyl)amino)ethoxyformamide (**3d**)

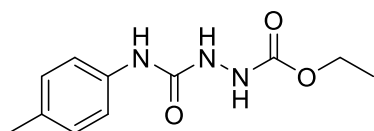

Compound **3d** was obtained as a tan brown solid (362 mg, 1.62 mmol, 81%). **HRMS (EI)** Calcd for  $C_{10}H_{14}N_3O_3$   $[M+H]^+$  224.1035,  $[M+H]^+$  Found 224.1031  **$^1H$ -NMR (DMSO)**:  $\delta$  7.45 (d,  $J = 7.5$  Hz, 2H), 7.24 (t, 7.5 Hz, 2H), 6.94 (t,  $J = 7.5$  Hz, 2H), 4.06 (q, 7, 14 Hz, 3H), 1.19 (t,  $J = 6.5$  Hz, 3H);  **$^{13}C$ -NMR (DMSO)**:  $\delta$  157.13, 155.75, 139.86, 128.95, 128.76, 121.97, 118.62, 118.43, 60.67, 14.72; **IR (KBr)**: 3300 (m), 3259 (m), 2980 (s), 1744 (s), 1595 (s), 1554 (s), 1442 (m), 1317 (w), 1226 (s), 1202 (s), 1053 (m), 741 (s), 695 (s)  $cm^{-1}$

*N*-([4-methylphenyl]carbamoyl)amino)ethoxyformamide (**3e**)

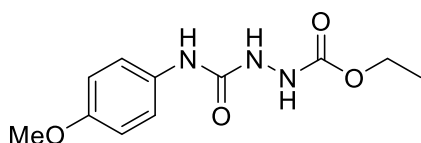

Compound **3e** was obtained as a white solid (245 mg, 1.03 mmol, 51%). **HRMS (EI)** Calcd for  $C_{11}H_{16}N_3O_3$   $[M+H]^+$  238.1191,  $[M+H]^+$  Found 238.1192;  **$^1H$ -NMR (DMSO)**:  $\delta$  7.33 (d,  $J = 8$  Hz, 2H), 7.04 (d,  $J = 8$  Hz, 2H), 4.05 (q,  $J = 7.5, 14.5$  Hz, 2H), 2.22 (s, 3H), 1.19 (t,  $J = 6.5$  Hz, 3H);  **$^{13}C$ -NMR (DMSO)**:  $\delta$  157.15, 155.78, 137.27, 130.75, 129.15, 118.74, 60.65, 20.48, 14.73; **IR (KBr)**:

3315 (m), 3267 (m), 2987 (w), 2905 (w), 1742 (s), 1682 (m), 1640 (m), 1597 (s), 1550 (s), 1515 (s), 1304 (m), 1202 (s), 825 (s), 663 (s)  $\text{cm}^{-1}$

*N*-({[4-methoxyphenyl]carbamoyl}amino)ethoxyformamide (**3f**)

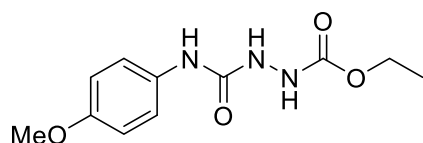

Compound **3f** was obtained as a white solid (219 mg, 0.86 mmol, 43%). **HRMS (EI)** Calcd for  $\text{C}_{11}\text{H}_{16}\text{N}_3\text{O}_4$   $[\text{M}+\text{H}]^+$  254.1140,  $[\text{M}+\text{H}]^+$  Found 254.1131;  **$^1\text{H-NMR}$  (DMSO)**:  $\delta$  7.35 (d,  $J$  = 9 Hz, 2H), 6.83 (d,  $J$  = 7 Hz, 2H), 4.04 (q,  $J$  = 10, 20 Hz, 2H), 3.70 (s, 3H), 1.19 (t,  $J$  = 6.5 Hz, 3H);  **$^{13}\text{C-NMR}$  (DMSO)**: 156.98, 155.80, 154.41, 132.72, 120.72, 120.28, 113.78, 60.47, 55.13, 14.55; **IR (KBr)**: 3278 (m), 2978 (m), 1736 (s), 1682 (m), 1640 (m), 1597 (s), 1556 (s), 1513 (s), 1455 (w), 1295 (m), 1231 (s), 1187 (s), 834 (s), 756 (m), 665 (m)  $\text{cm}^{-1}$

#### General procedure for synthesis of phenyl-1,2,4-triazolidine-3,5-dione's derivatives (**4a-f**)

A 100mL RBF is charged 4M potassium hydroxide (10mL) and *N*-({[4-(pentafluoro- $\lambda^6$ -sulfanyl)phenyl]carbamoyl}amino)ethoxyformamide (**517** mg, 1.5 mmol). The suspension was refluxed at 100°C until the solid had completely dissolved, at which point the reaction was left for an additional hour and the solution was filtered. Upon cooling to room temperature, the solution was acidified *via* the dropwise addition of concentrated hydrochloric acid. The precipitate was isolated *via* vacuum filtration and the mother liquor was concentrated *in vacuo*. The subsequent residue was extracted twice with hot ethanol (2x10 mL) and the combined organic layers were then filtered, concentrated *in vacuo* and lyophilised.

4-[4-(pentafluoro- $\lambda^6$ -sulfanyl)phenyl]-1,2,4-triazolidine-3,5-dione (**4a**)

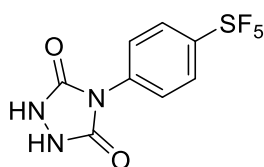

Compound **4a** was obtained as a white solid (410 mg, 1.34 mmol, 90%). **HRMS (EI)** Calcd for  $\text{C}_8\text{H}_7\text{N}_3\text{O}_2\text{SF}_5$   $[\text{M}+\text{H}]^+$  304.0179,  $[\text{M}+\text{H}]^+$  Found 304.0178;  **$^1\text{H-NMR}$  (DMSO)**:  $\delta$  8.04 (d,  $J$  = 7.5 Hz, 2H), 7.81 (d,  $J$  = 9 Hz, 2H);  **$^{13}\text{C-NMR}$  (DMSO)**:  $\delta$  152.58, 150.92, 150.76, 135.67, 126.75, 126.71, 125.79;  **$^{19}\text{F-NMR}$  (DMSO)**:  $\delta$  86.95 (q,  $J$  = 86.48, 1F), 64.27 (d,  $J$  = 150.4 Hz, 4F); **IR (KBr)**: 3052 (w), 1697 (m), 1507 (w), 1220 (w), 1107 (m), 834 (s), 747 (s)

4-[4-(trifluoromethyl)phenyl]-1,2,4-triazolidine-3,5-dione (**4b**)

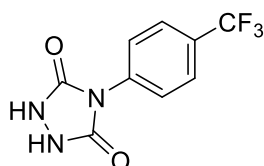

Compound **4d** was obtained as a pale yellow solid (304 mg, 1.24 mmol, 82%). **HRMS (EI)** Calcd for  $\text{C}_9\text{H}_7\text{F}_3\text{N}_3\text{O}_2$   $[\text{M}+\text{H}]^+$  246.0490,  $[\text{M}+\text{H}]^+$  Found 246.0496;  **$^1\text{H-NMR}$  (DMSO)**:  $\delta$  7.86 (d, 2H,  $J$  = 10 Hz), 7.77 (d, 2H,  $J$  = 10 Hz);  **$^{13}\text{C-NMR}$  (DMSO)**:  $\delta$  152.77, 135.92, 127.82, 126.07, 125.98,

122.82; **<sup>19</sup>F-NMR (DMSO):**  $\delta$  60.96 (s, 1F) ; **IR (KBr):** 3063 (w), 1697 (s, br), 1615 (w), 1420 (s), 1319 (s) 1174 (s), 1120 (s), 1069 (m), 1021 (w), 848 (m), 790 (w), 762 (m) cm<sup>-1</sup>

*4-[4-(fluoro)phenyl]-1,2,4-triazolidine-3,5-dione (4c)*

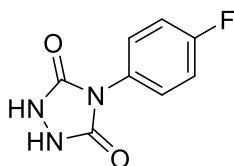

Compound **4c** was obtained as a white solid (190 mg, 0.97 mmol, 65%). **HRMS (EI)** Calcd for C<sub>8</sub>H<sub>7</sub>FN<sub>3</sub>O<sub>2</sub> [M+H]<sup>+</sup> 196.0522, [M+H]<sup>+</sup> Found 196.0527; **<sup>1</sup>H-NMR (DMSO):**  $\delta$  7.49 (br s, 2H), 7.31 (t, J = 10.5, 20.5 Hz, 2H); **<sup>13</sup>C-NMR (DMSO):**  $\delta$  162.23, 159.91, 153.46, 128.40, 115.98; **<sup>19</sup>F-NMR (DMSO):**  $\delta$  -114.04; **IR (KBr):** 3207 (w), 3160 (w), 3088 (w), 1682 (s), 1602 (w), 1511 (s), 1436 (m), 1215 (s), 1155 (w), 1116 (w), 1086 (w), 844 (s), 790 (s), 758 (s) cm<sup>-1</sup>

*4-phenyl-1,2,4-triazolidine-3,5-dione (4d)*

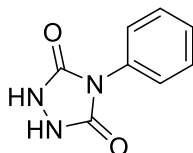

Compound **4d** was obtained as a brown crystalline solid (133 mg, 0.78 mmol, 78%). **HRMS (EI)** Calcd for C<sub>8</sub>H<sub>8</sub>N<sub>3</sub>O<sub>2</sub> [M+H]<sup>+</sup> 178.0617, [M+H]<sup>+</sup> Found 178.0614; **<sup>1</sup>H-NMR (DMSO):**  $\delta$  7.50-7.36 (5H); **<sup>13</sup>C-NMR (DMSO):**  $\delta$  153.53, 132.09, 128.97, 127.78, 126.24; **IR (KBr):** 3151 (w), 3103 (w) 3054 (w), 1777 (s, br), 1679 (w), 1597 (m), 1504 (m), 1436 (w), 1220 (s), 1177 (s), 1116 (m), 911 (w), 892 (m), 756 (m), 689 (s, br) cm<sup>-1</sup>.

*4-[4-(methyl)phenyl]-1,2,4-triazolidine-3,5-dione (4e)*

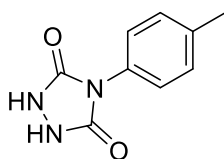

Compound **4e** was obtained as a white crystalline solid (209 mg, 1.1 mmol, 73%). **HRMS (EI)** Calcd for C<sub>9</sub>H<sub>10</sub>N<sub>3</sub>O<sub>2</sub> [M+H]<sup>+</sup> 192.0773, [M+H]<sup>+</sup> Found 192.0773; **<sup>1</sup>H-NMR (DMSO):**  $\delta$  7.31 (d, 8 Hz, 2H), 7.27 (d, 8.5 Hz, 2H), 2.34 (s, 3H); **<sup>13</sup>C-NMR (DMSO):**  $\delta$  153.75, 137.30, 129.47, 129.44, 126.14, 20.86; **IR (KBr):** 3097 (w), 3170 (w), 3062 (w), 1697 (s), 1615 (w), 1522 (w), 1420 (br m), 1321 (s), 1174 (s), 1120 (s), 848 (m), 792 (m), 762 (m) cm<sup>-1</sup>

*4-[4-(methoxy)phenyl]-1,2,4-triazolidine-3,5-dione (4f)*

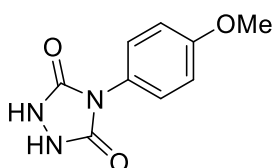

Compound **4f** was obtained as a brown crystalline solid (208 mg, 1 mmol, 67%). **HRMS (EI)** Calcd for  $C_9H_9N_3O_3$   $[M+H]^+$  208.0722,  $[M+H]^+$  Found 208.0726;  **$^1H$ -NMR (DMSO)**:  $\delta$  6.52 (d,  $J$  = 10 Hz, 2H), 6.22 (d,  $J$  = 10 Hz, 2H), 3.02 (s, 3H);  **$^{13}C$ -NMR (DMSO)**:  $\delta$  158.49, 153.75, 127.64, 124.48, 114.04, 53.37; **IR (KBr)**: 3227 (br s), 1766 (w), 1673 (br s), 1608 (m), 1507 (s), 1444 (m), 1241 (m), 1215 (w), 1170 (w), 1116 (w), 834 (s), 786 (s), 762 (s)  $cm^{-1}$ .

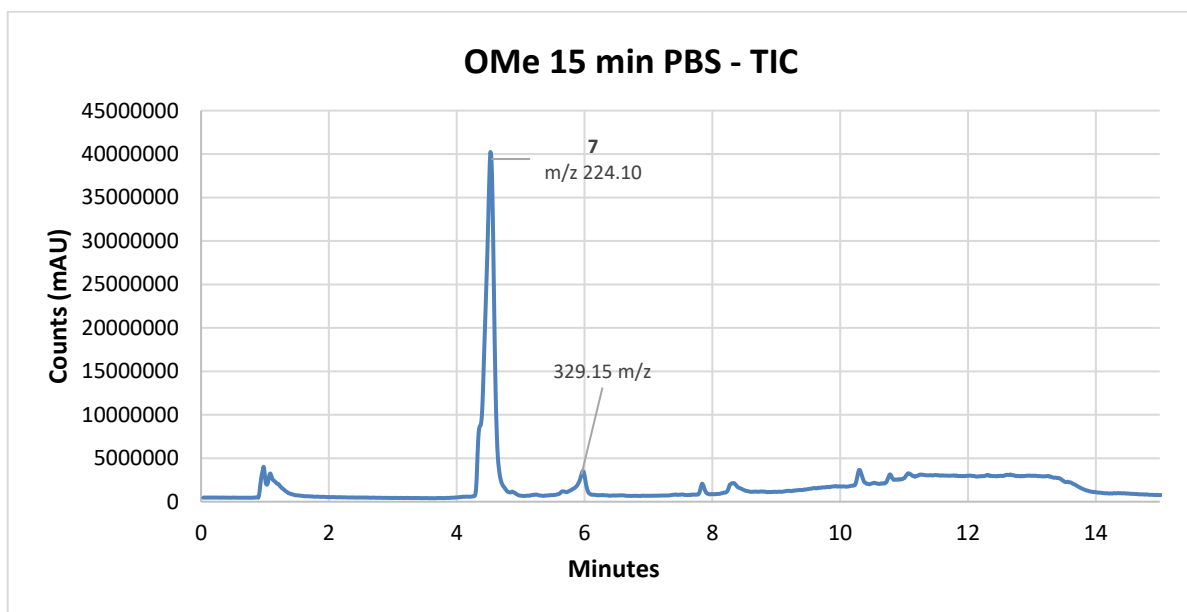

**Figure S1.** TIC chromatogram of **6f** after 15 minutes reaction time in phosphate-buffered saline, representative of the reaction being performed under aqueous conditions as previously reported in the literature

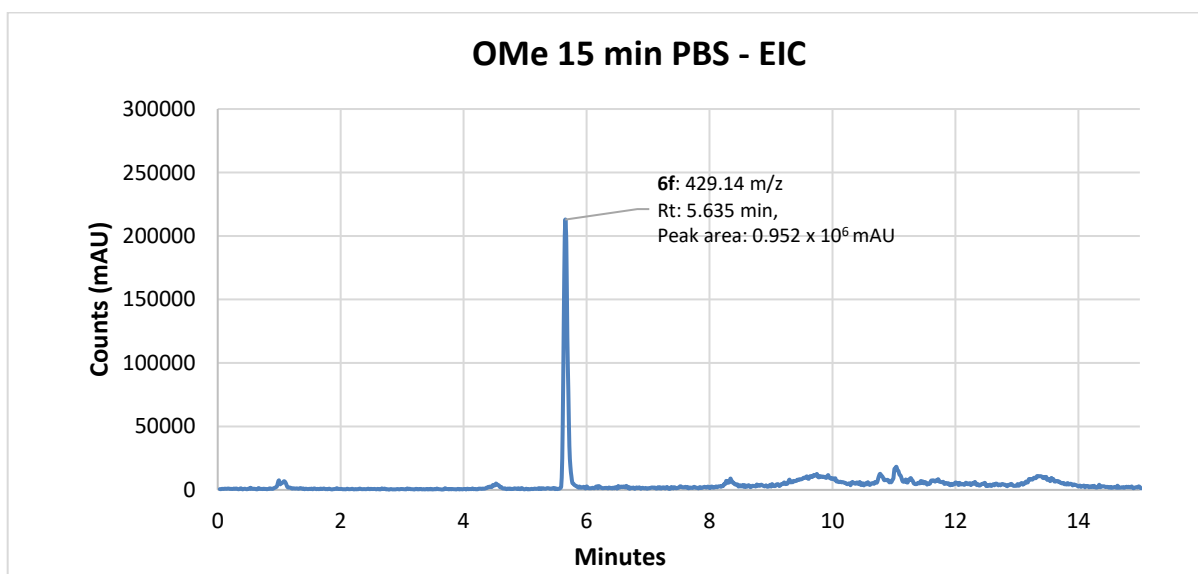

**Figure S2.** EIC chromatogram of **6f** after 15 minutes reaction time in phosphate-buffered saline, representative of the reaction being performed under aqueous conditions as previously reported in the literature with relatively low conversion

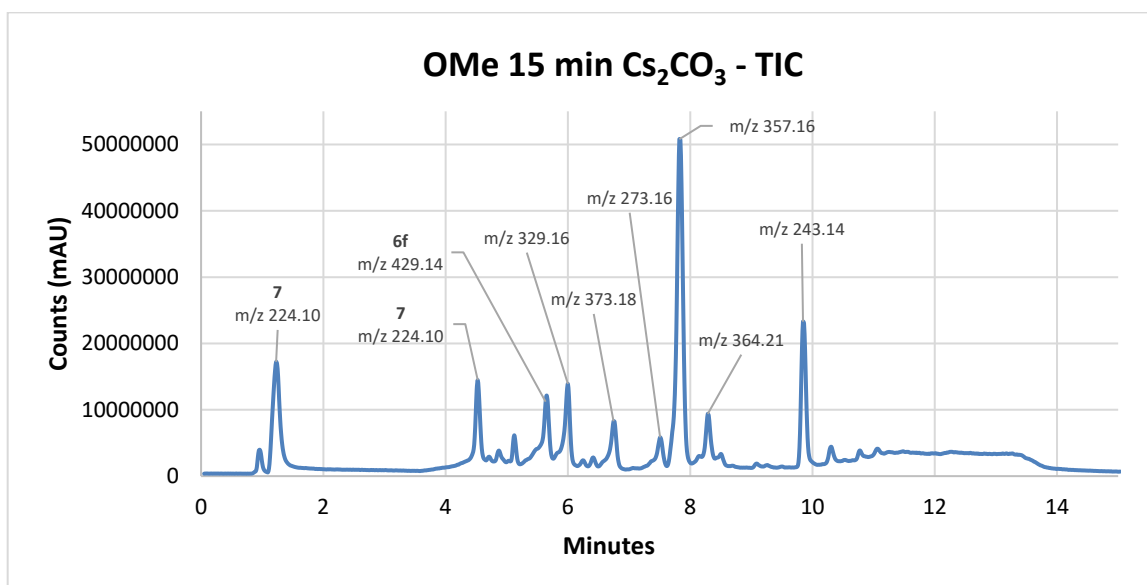

**Figure S3.** TIC chromatogram of **6f** after 15 minutes reaction time in acetonitrile and caesium carbonate (2 equiv.), representative of synthetic scale reaction performed under Condition **A**

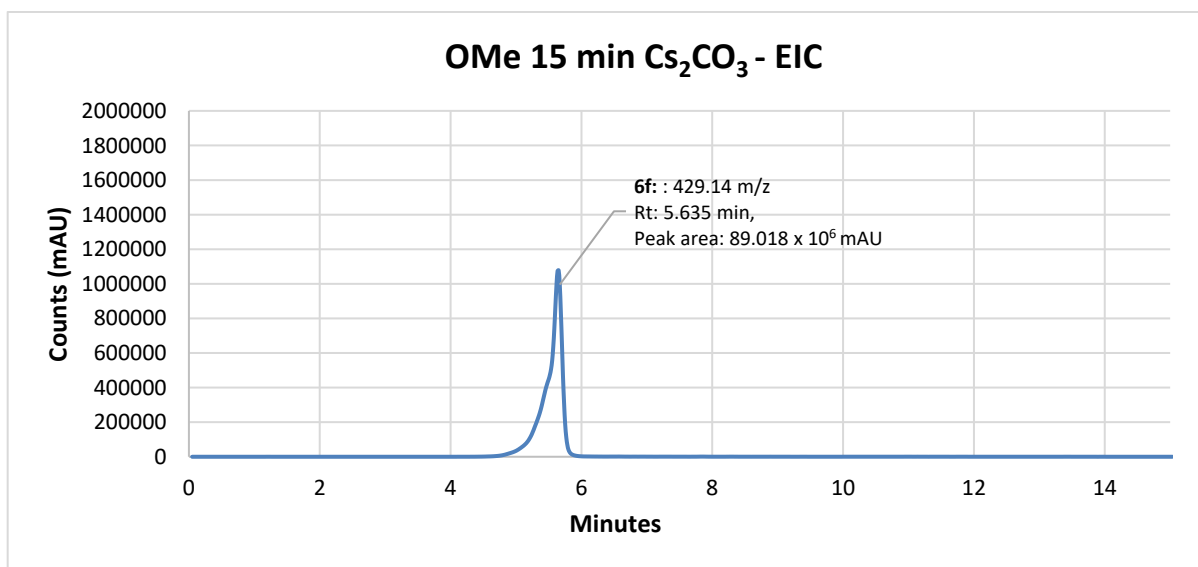

**Figure S4.** TIC chromatogram of **6f** after 15 minutes reaction time in acetonitrile and caesium carbonate (2 equiv.), representative of synthetic scale reaction performed under Condition **A**. Despite obtaining the highest mAU reading in the LC-MS catalytic study, this reaction gave numerous by-products and >5% **6f** on a synthetic scale.

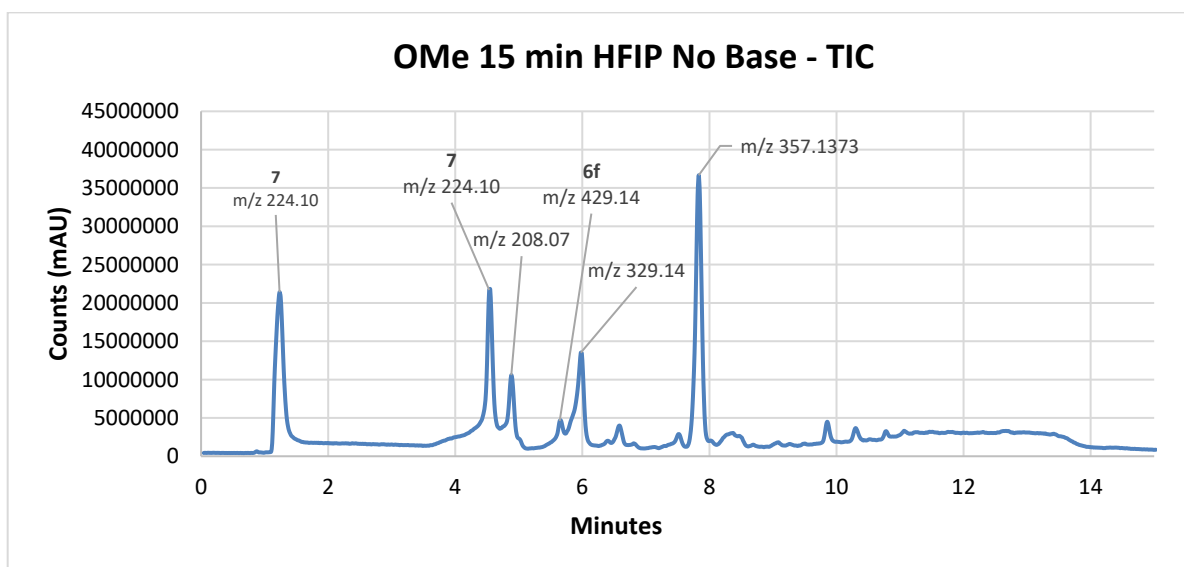

**Figure S5.** TIC chromatogram of **6f** after 15 minutes reaction time in acetonitrile and HFIP (2 equiv.), representative of synthetic scale reaction performed under Condition **A**. Despite obtaining the highest mAU reading in the LC-MS catalytic study, this reaction proceeded slowly on a synthetic scale.

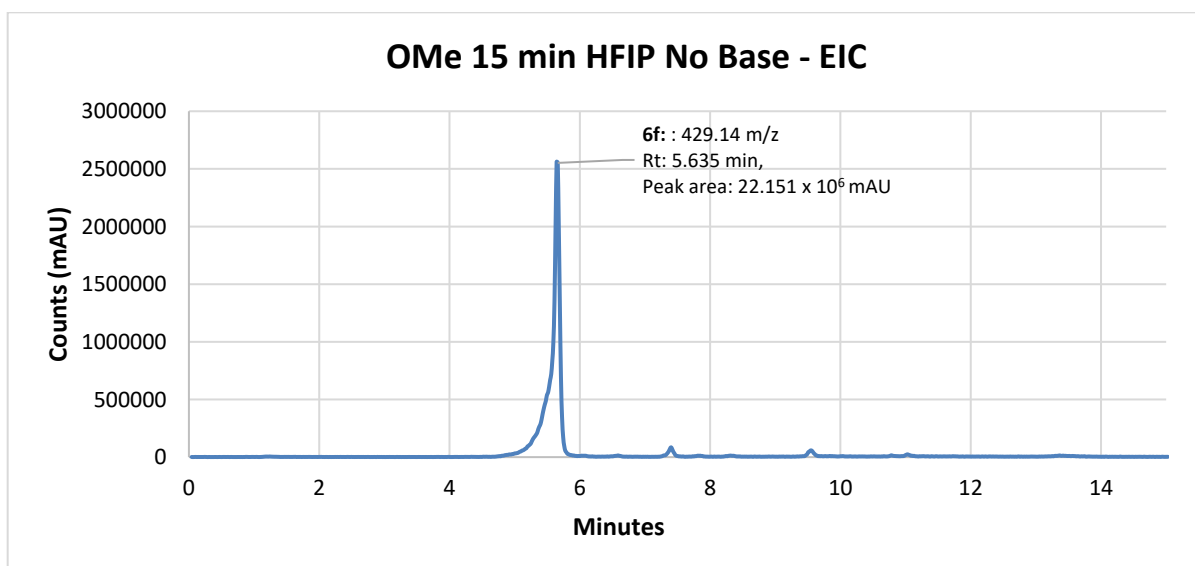

**Figure S6.** EIC chromatogram of **6f** after 15 minutes reaction time in acetonitrile and HFIP (2 equiv.), representative of synthetic scale reaction performed under Condition **A**. Despite obtaining a relatively high mAU reading in the LC-MS catalytic study, this reaction proceeded slowly on a synthetic scale.



**Table S3:** The three conditions tested on a synthetic scale based on results obtained from LC-MS catalytic experiments. Condition A: **5a** decomposed rapidly to give numerous by-products and < 5% yield of **6a**, Condition B: Reaction was very slow (> 12 hrs), rendering it unsuitable for the purposes of bioconjugation, Condition C: Reaction proceeded rapidly with minimal by-product formation.

| Reaction ( <b>6a</b> ) | Conditions                                       | Yield (%)   |
|------------------------|--------------------------------------------------|-------------|
| <b>A</b>               | MeCN, Cs <sub>2</sub> CO <sub>3</sub> (2 equiv.) | < 5         |
| <b>B</b>               | MeCN, HFIP (2 equiv.)                            | No reaction |
| <b>C</b>               | DCM, HFIP (2 equiv.)                             | 54          |

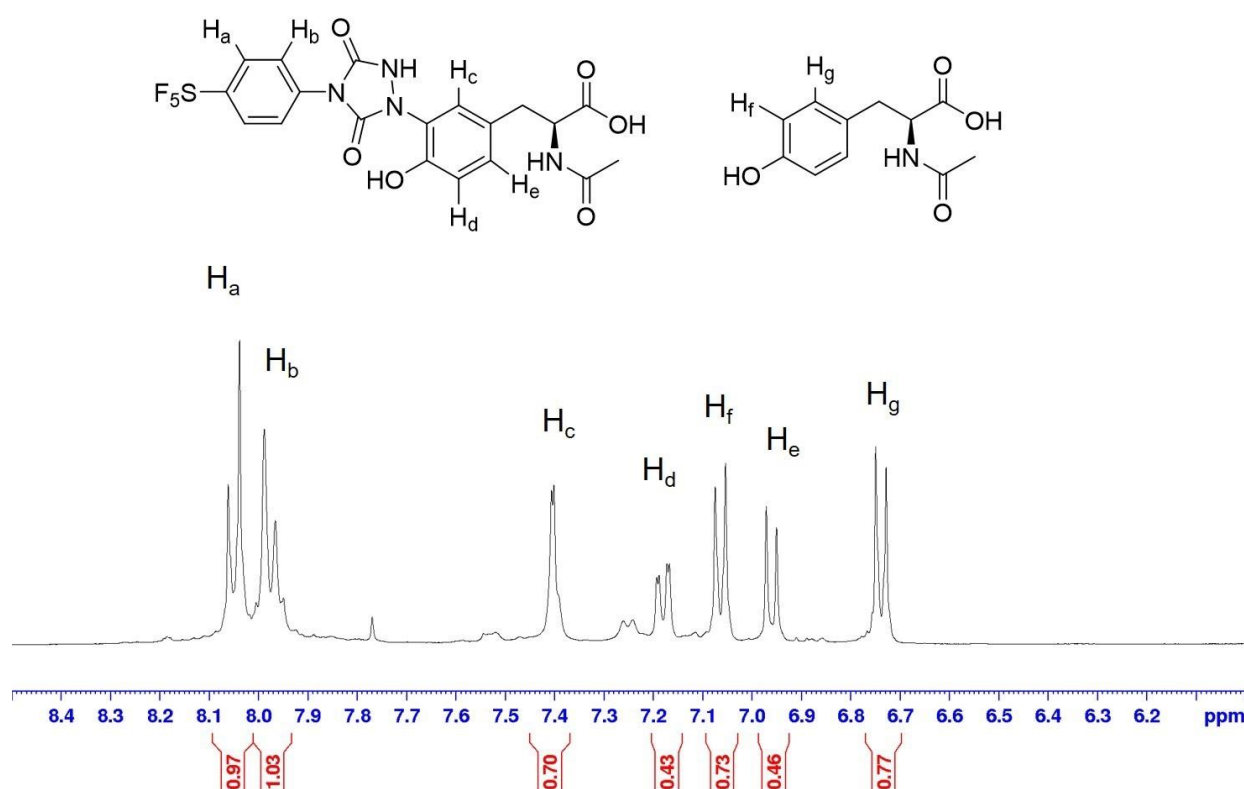

**Figure S7:** Example <sup>1</sup>H-NMR spectra of the crude product **6a** used for calculation of molar conversion using relative integration of aromatic peaks (H<sub>e</sub>/H<sub>g</sub>)

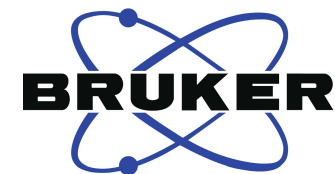

Current Data Parameters  
 NAME Jul04-2022  
 EXPNO 15  
 PROCNO 1

F2 - Acquisition Parameters  
 Date\_ 20220705  
 Time\_ 9.30 h  
 INSTRUM AVNEO  
 PROBHD Z175272\_0008 (  
 PULPROG zg30  
 TD 131072  
 SOLVENT Acetone  
 NS 32  
 DS 2  
 SWH 8196.722 Hz  
 FIDRES 0.125072 Hz  
 AQ 7.9953918 sec  
 RG 101  
 DW 61.000 usec  
 DE 13.54 usec  
 TE 298.0 K  
 D1 1.00000000 sec  
 TD0 1  
 SFO1 400.1524709 MHz  
 NUC1 1H  
 P0 3.33 usec  
 P1 10.00 usec  
 PLW1 19.63299942 W

F2 - Processing parameters  
 SI 65536  
 SF 400.1500000 MHz  
 WDW EM  
 SSB 0  
 LB 0.30 Hz  
 GB 0  
 PC 1.00

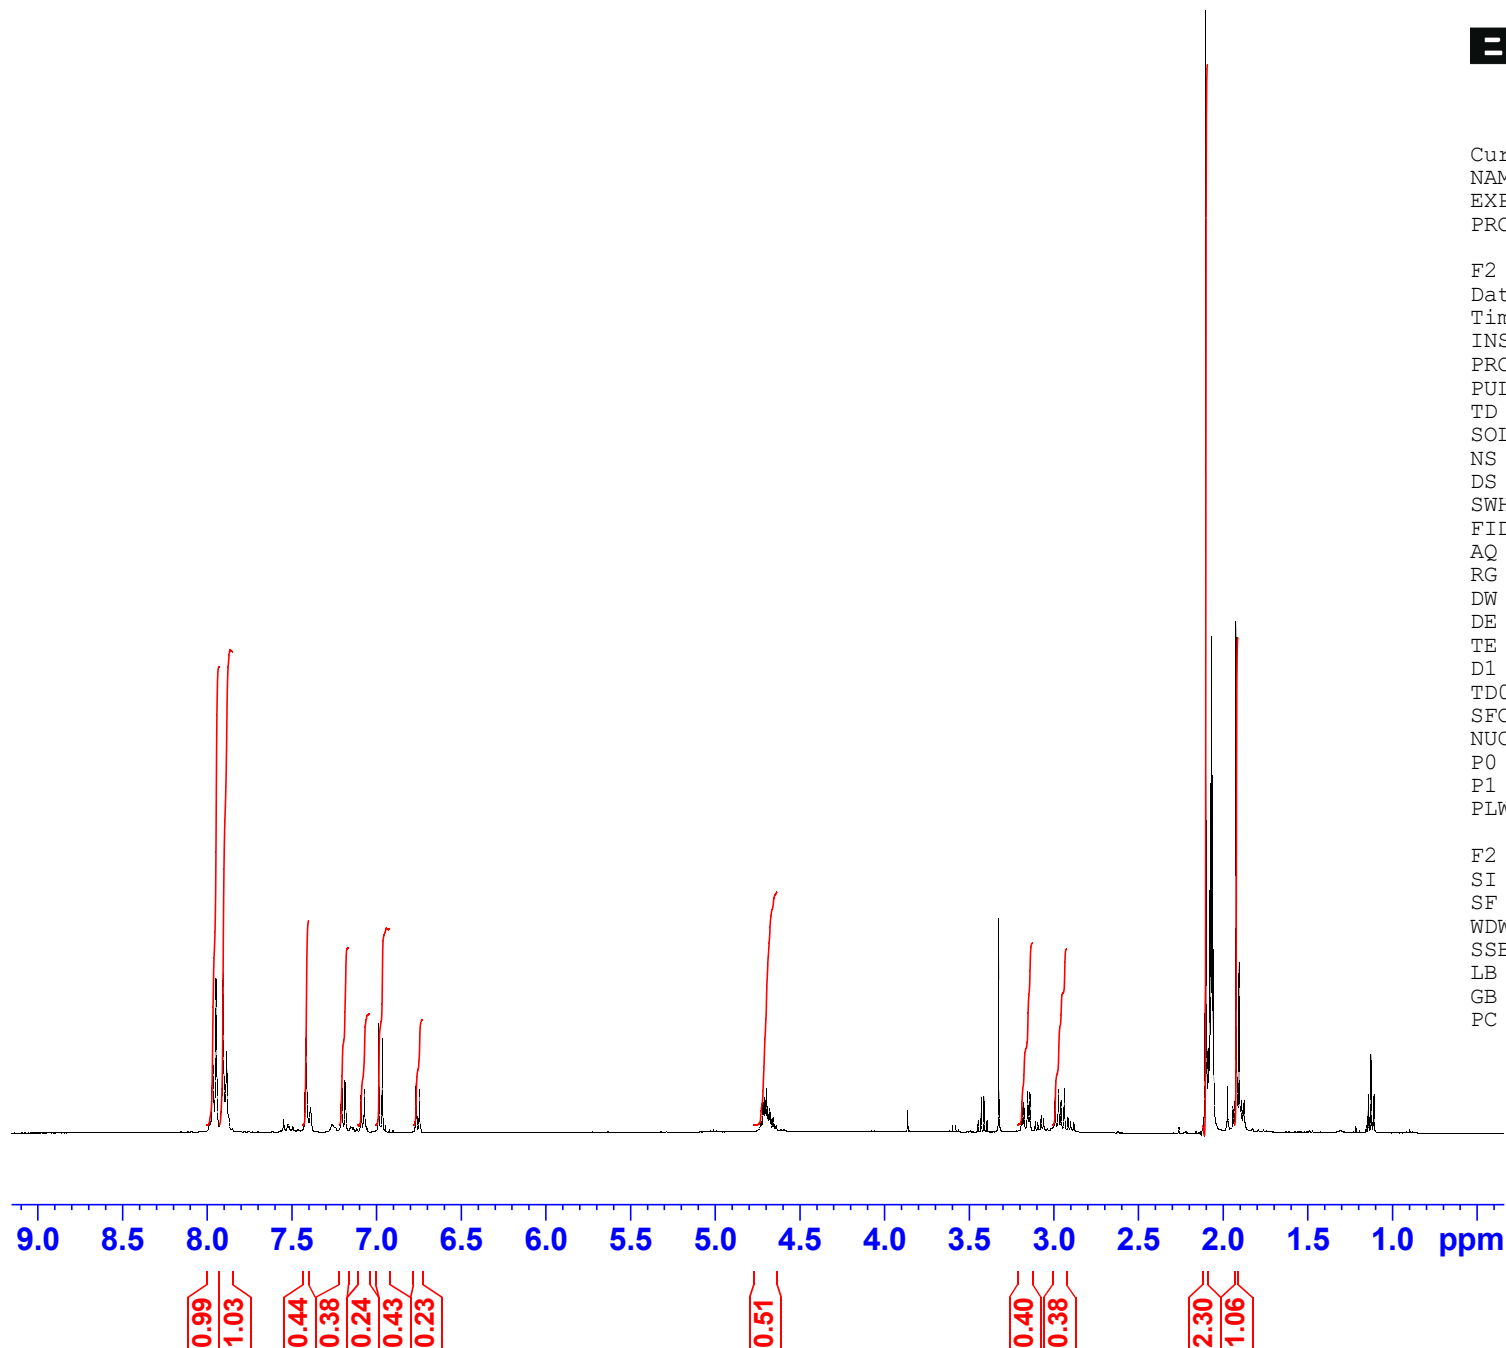

**Figure S8.** The  $^1\text{H}$  NMR (400 MHz,  $(\text{CD}_3)_2\text{CO}$ ) of compound **6a**

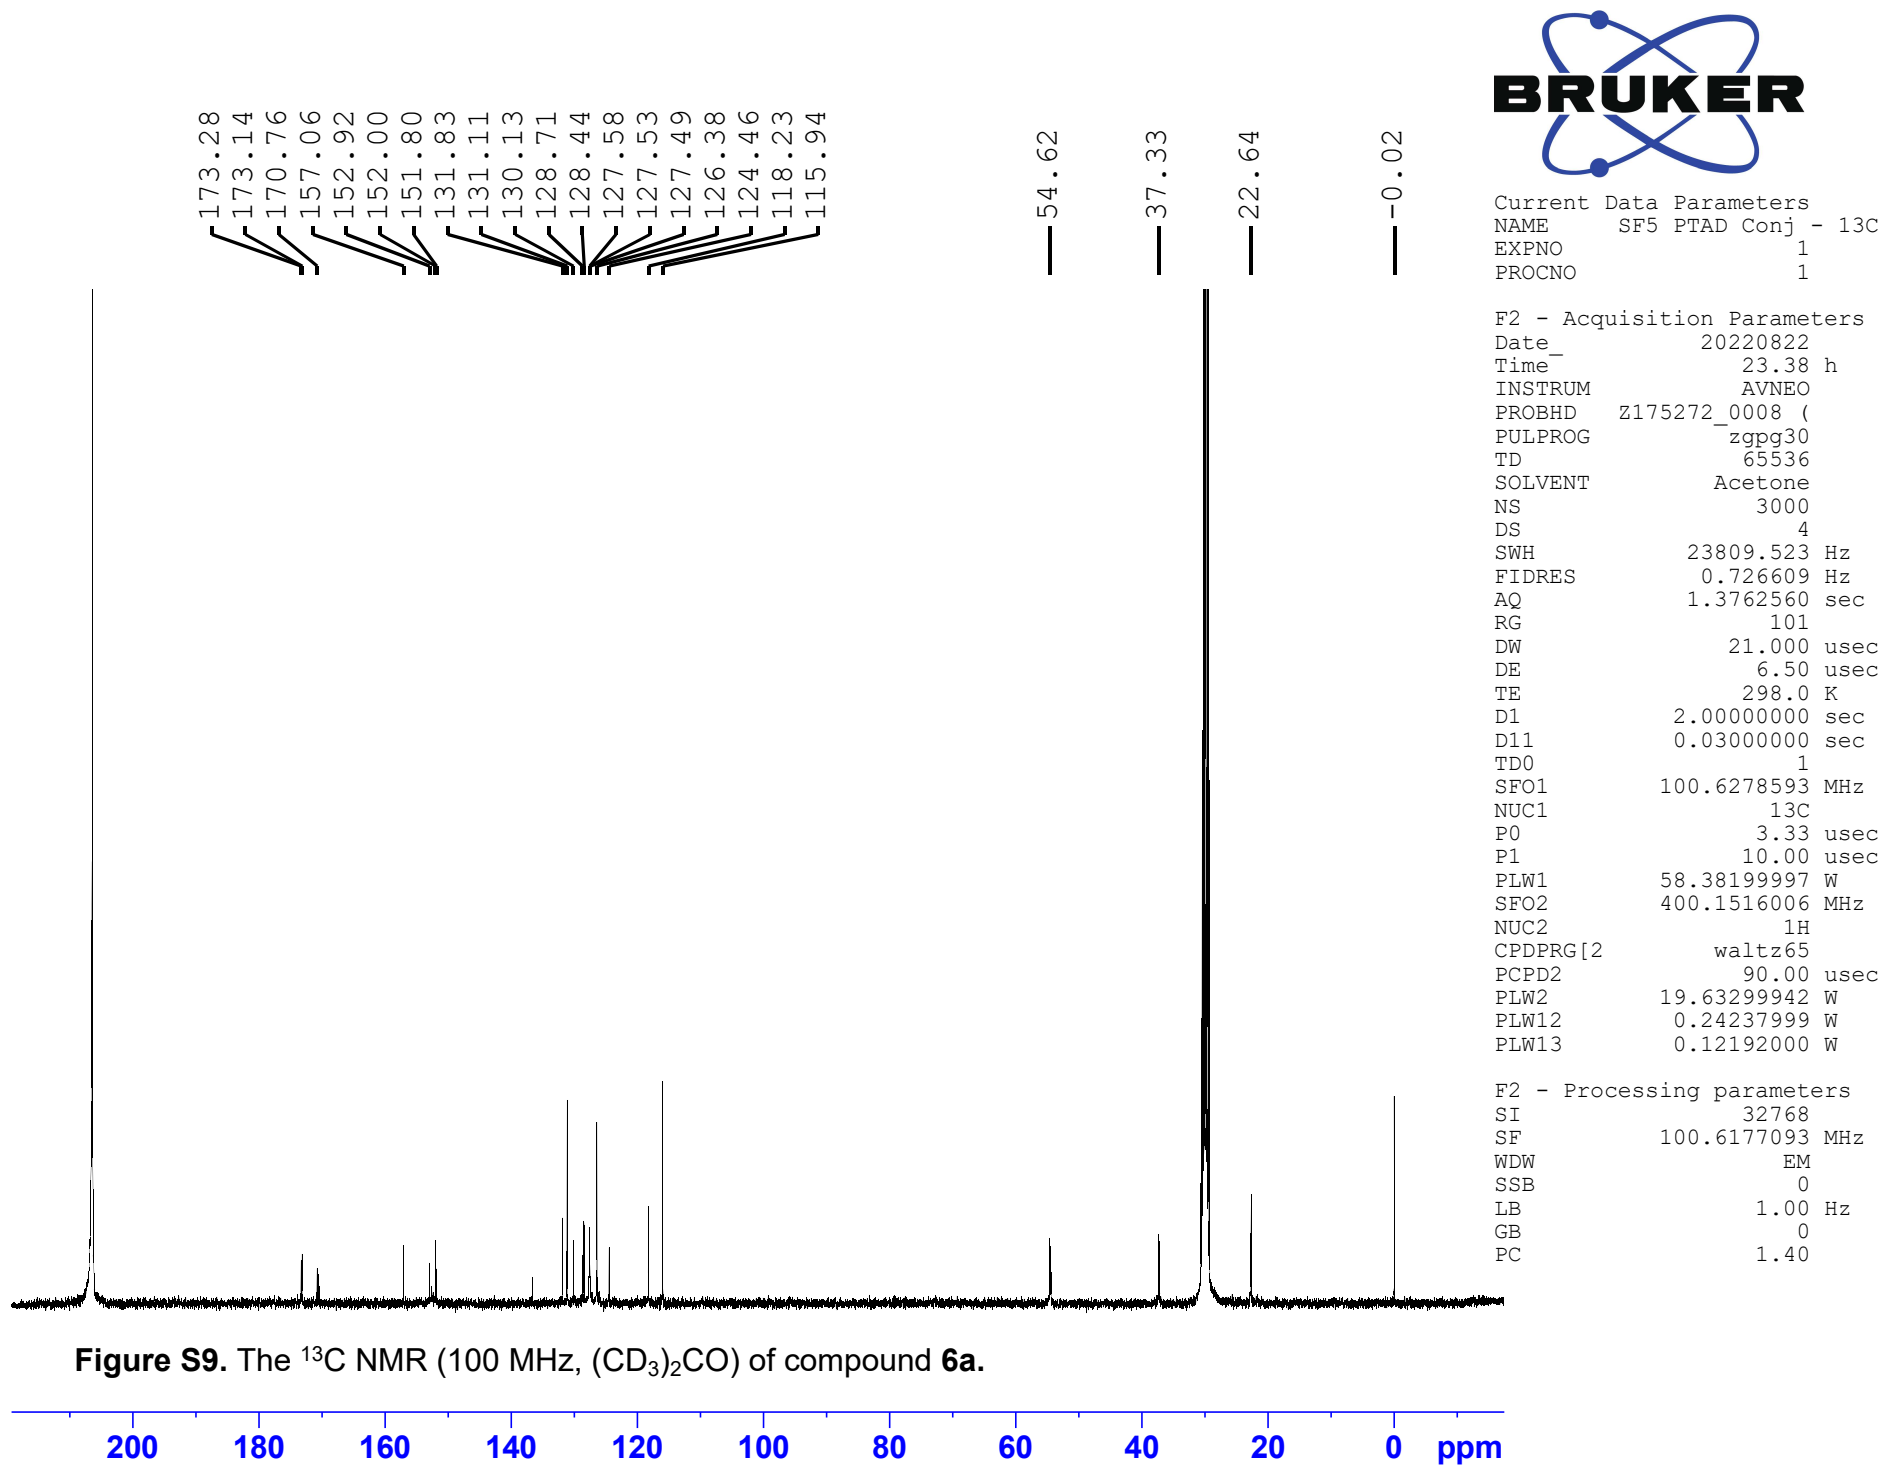Figure S9. The  $^{13}\text{C}$  NMR (100 MHz,  $(\text{CD}_3)_2\text{CO}$ ) of compound **6a**.

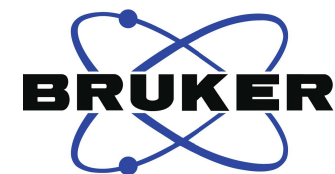

Current Data Parameters  
 NAME Jul04-2022  
 EXPNO 20  
 PROCNO 1

F2 - Acquisition Parameters  
 Date\_ 20220707  
 Time\_ 1.38 h  
 INSTRUM AVNEO  
 PROBHD Z175272\_0008 (  
 PULPROG zg  
 TD 131072  
 SOLVENT Acetone  
 NS 128  
 DS 4  
 SWH 147058.828 Hz  
 FIDRES 2.243940 Hz  
 AQ 0.4456448 sec  
 RG 101  
 DW 3.400 usec  
 DE 6.50 usec  
 TE 298.0 K  
 D1 1.00000000 sec  
 TD0 1  
 SFO1 376.5171850 MHz  
 NUC1 19F  
 P1 12.00 usec  
 PLW1 45.00000000 W

F2 - Processing parameters  
 SI 65536  
 SF 376.5171850 MHz  
 WDW EM  
 SSB 0  
 LB 0.30 Hz  
 GB 0  
 PC 1.00

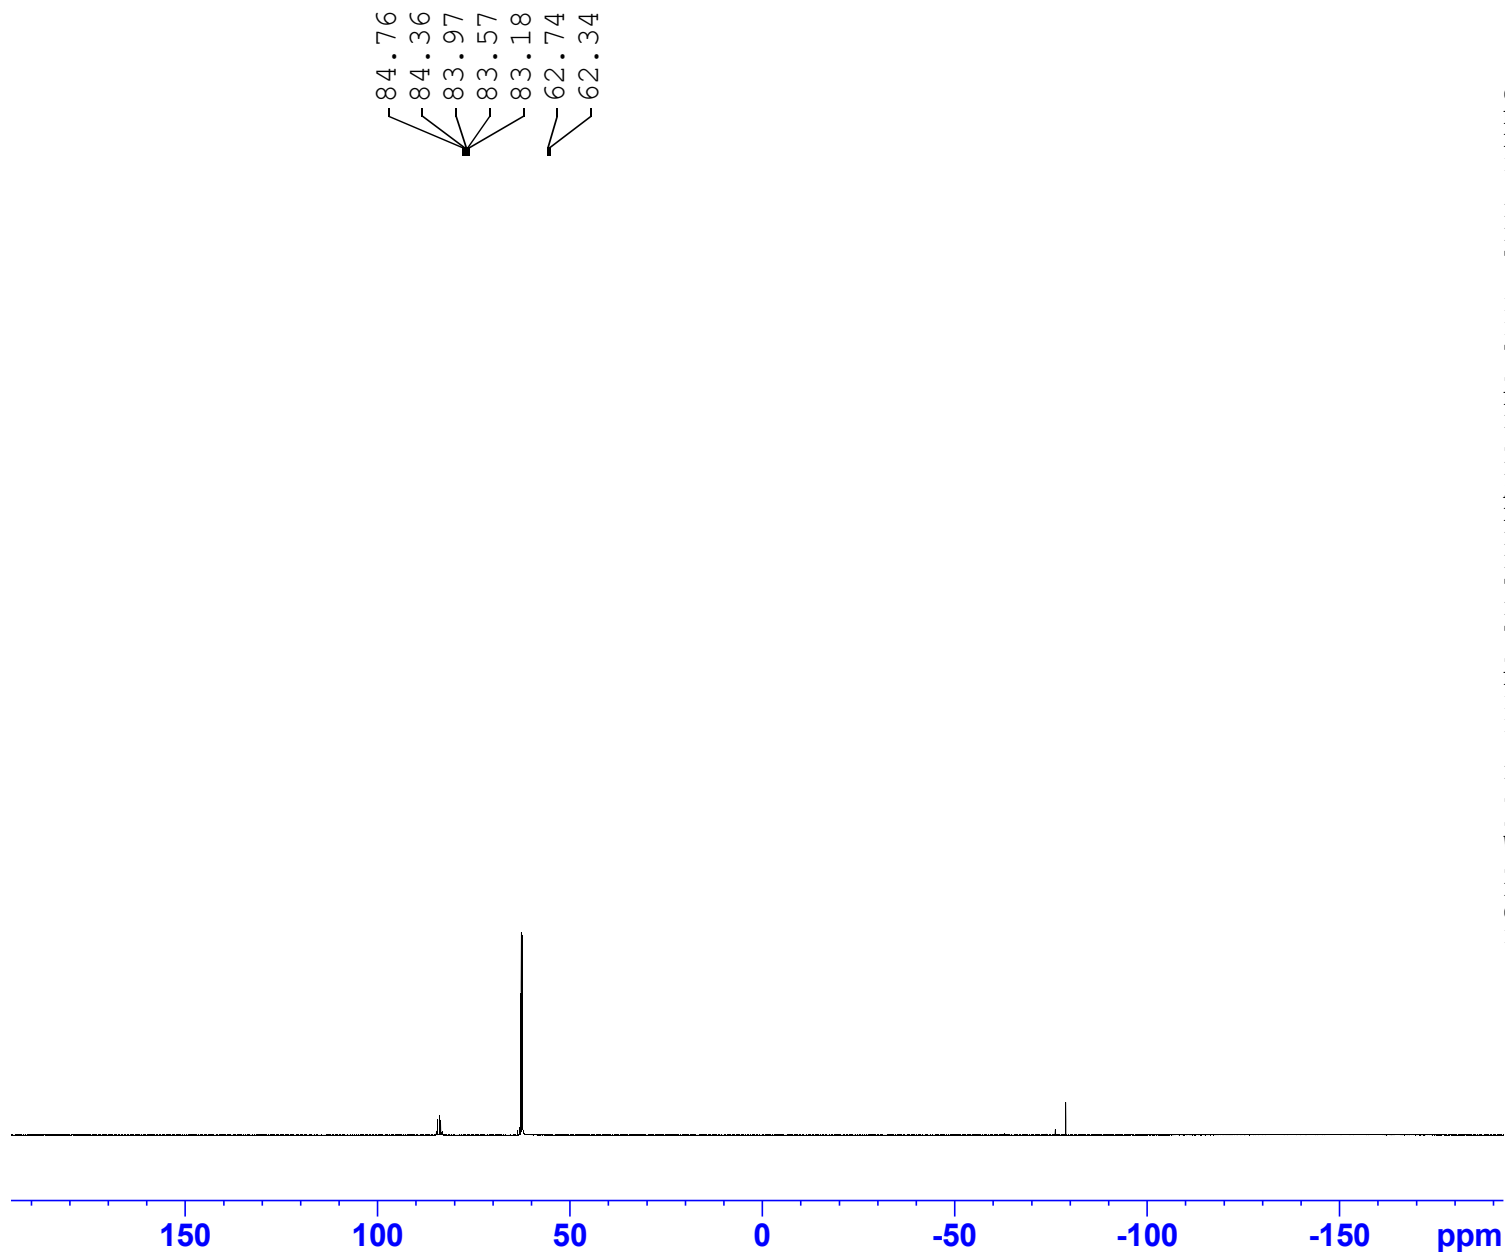

**Figure S10.** The  $^{19}\text{F}$  NMR (376.5 MHz,  $(\text{CD}_3)_2\text{CO}$ ) of compound **6a**.

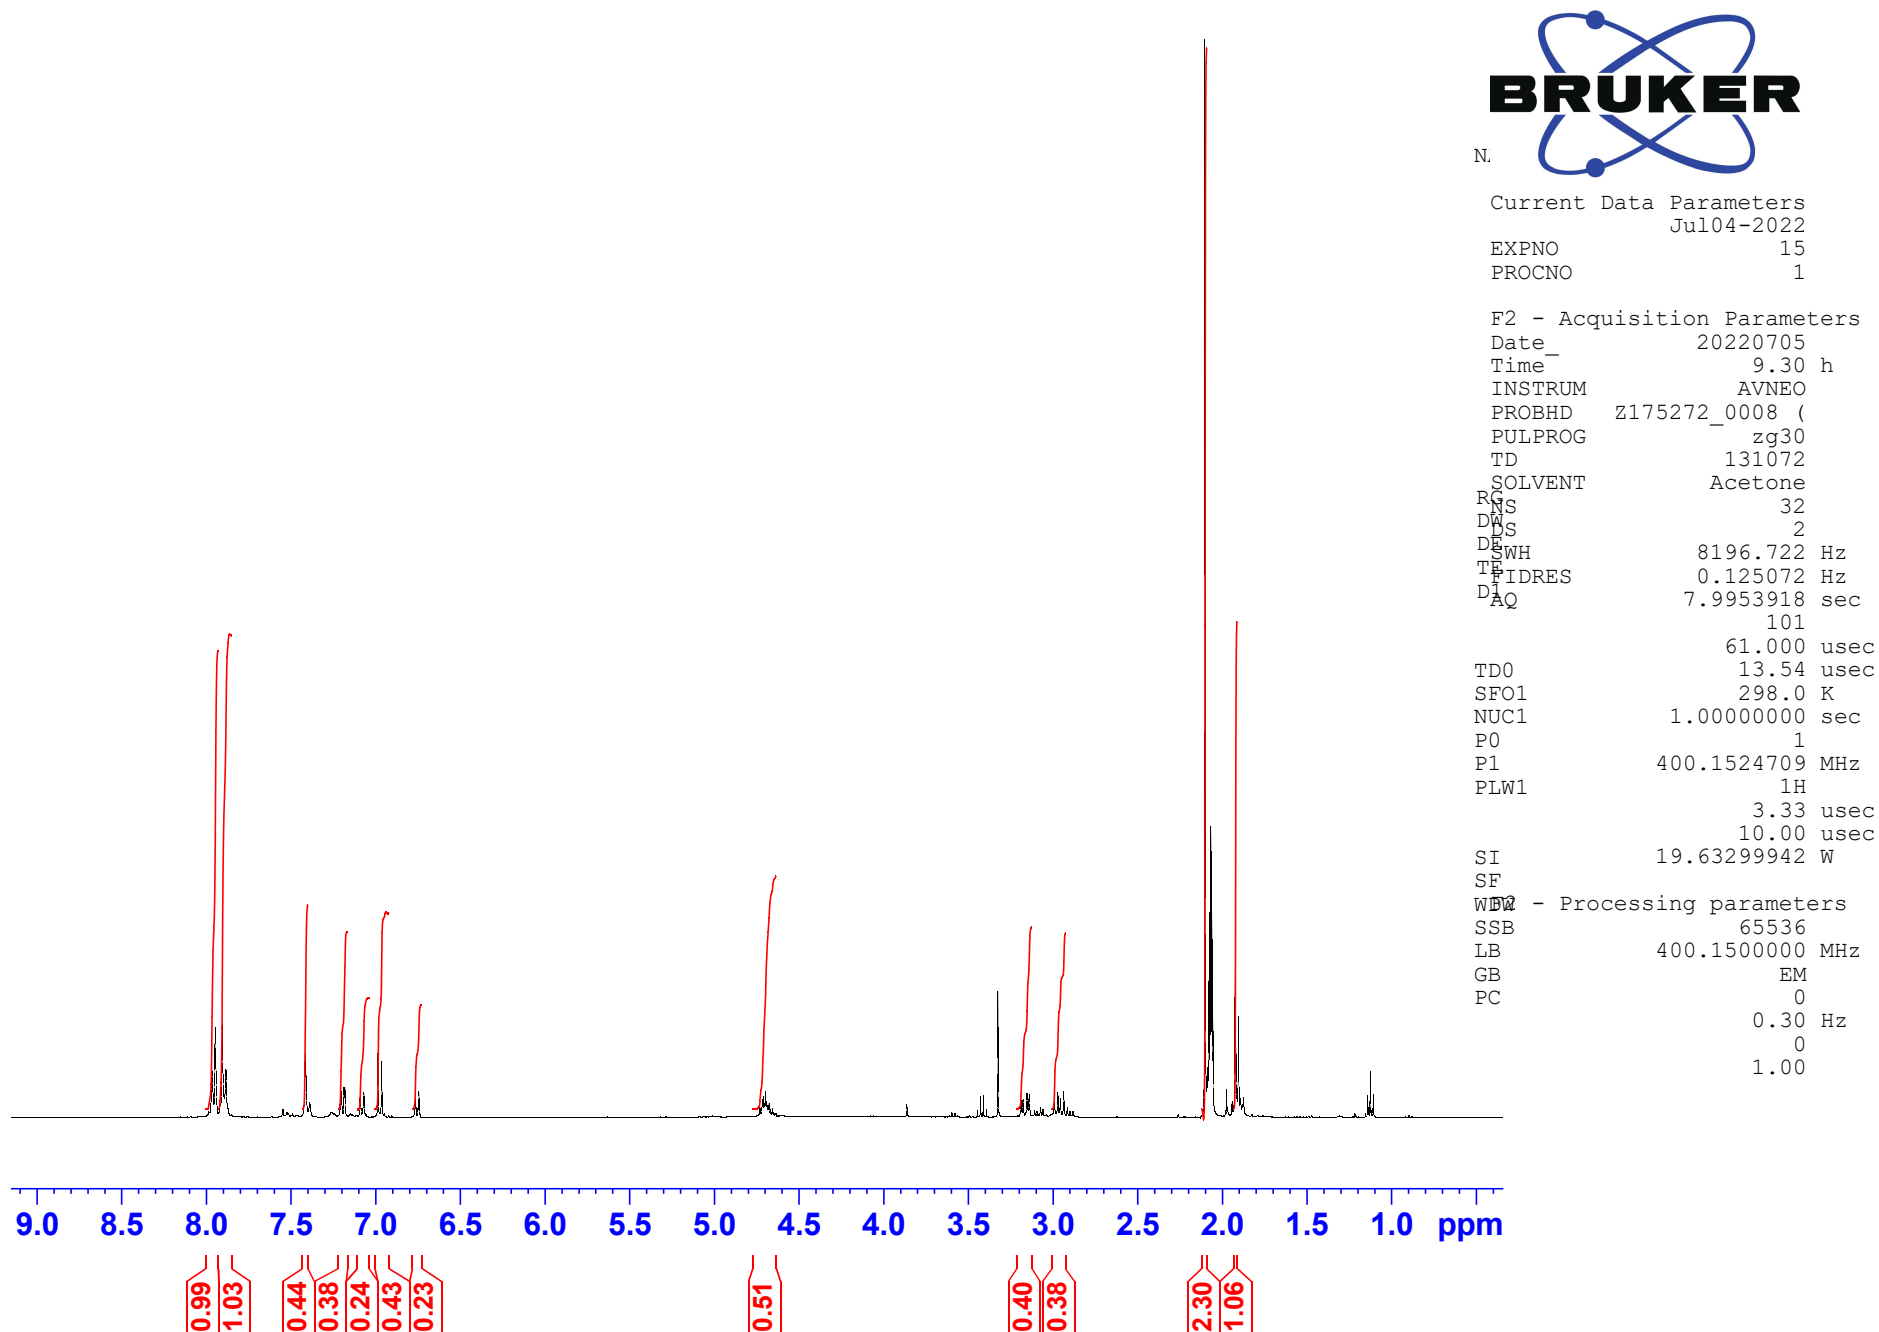Figure S11. The  $^1\text{H}$  NMR (400 MHz,  $(\text{CD}_3)_2\text{CO}$ ) of compound **6b**

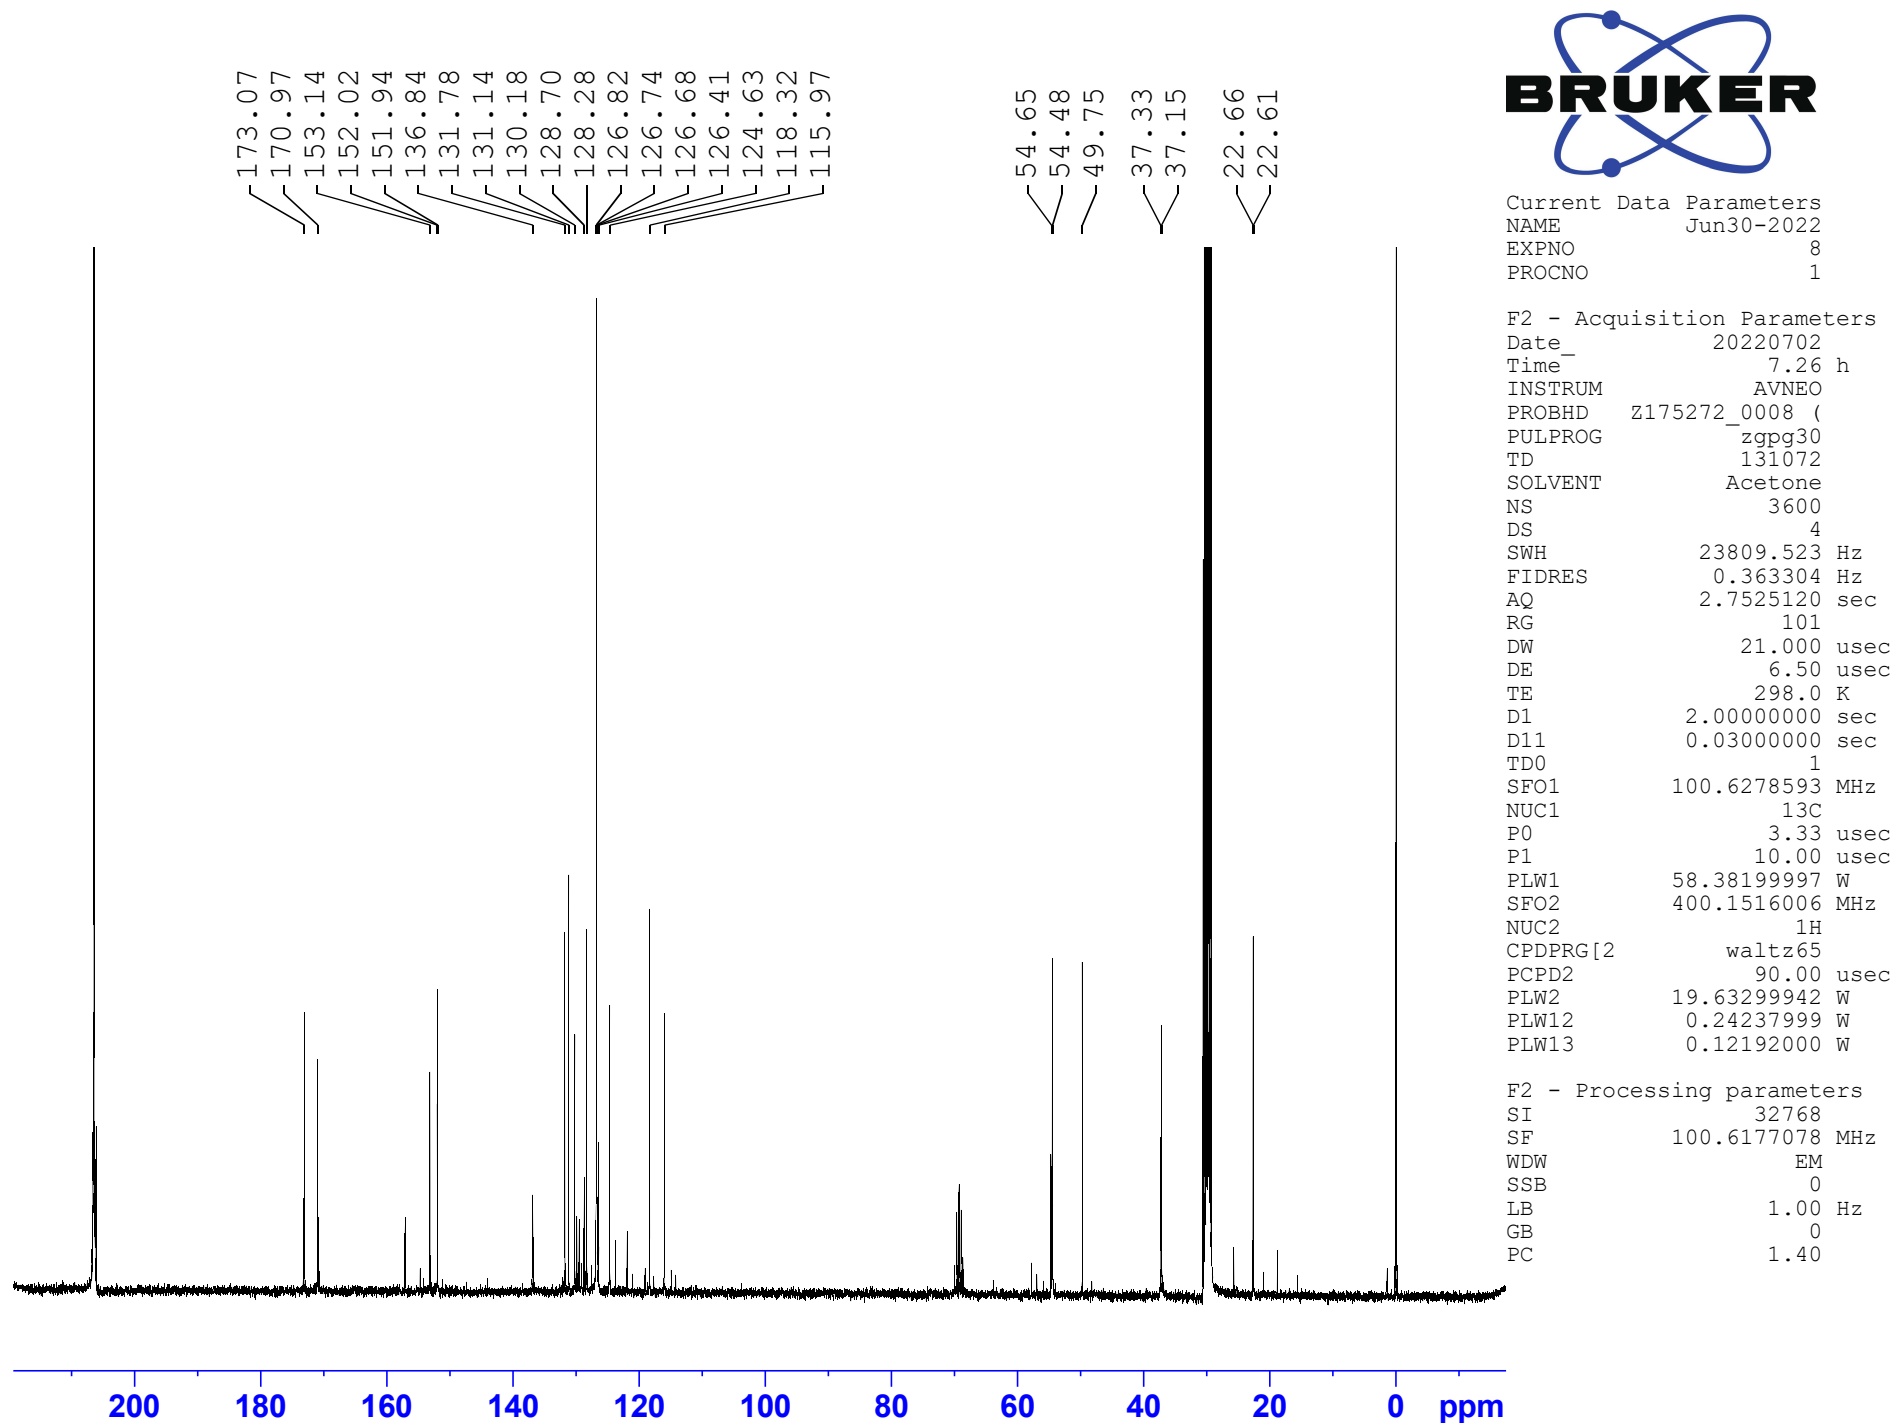



Current Data Parameters  
NAME Jul04-2022  
EXPNO 17  
PROCNO 1

F2 - Acquisition Parameters  
Date\_ 20220706  
Time\_ 5.11 h  
INSTRUM AVNEO  
PROBHD Z175272\_0008 (  
PULPROG zg  
TD 131072  
SOLVENT Acetone  
NS 128  
DS 4  
SWH 147058.828 Hz  
FIDRES 2.243940 Hz  
AQ 0.4456448 sec  
RG 101  
DW 3.400 usec  
DE 6.50 usec  
TE 298.0 K  
D1 1.00000000 sec  
TD0 1  
SFO1 376.5171850 MHz  
NUC1 19F  
P1 12.00 usec  
PLW1 45.00000000 W

F2 - Processing parameters  
SI 65536  
SF 376.5171850 MHz  
WDW EM  
SSB 0  
LB 0.30 Hz  
GB 0  
PC 1.00

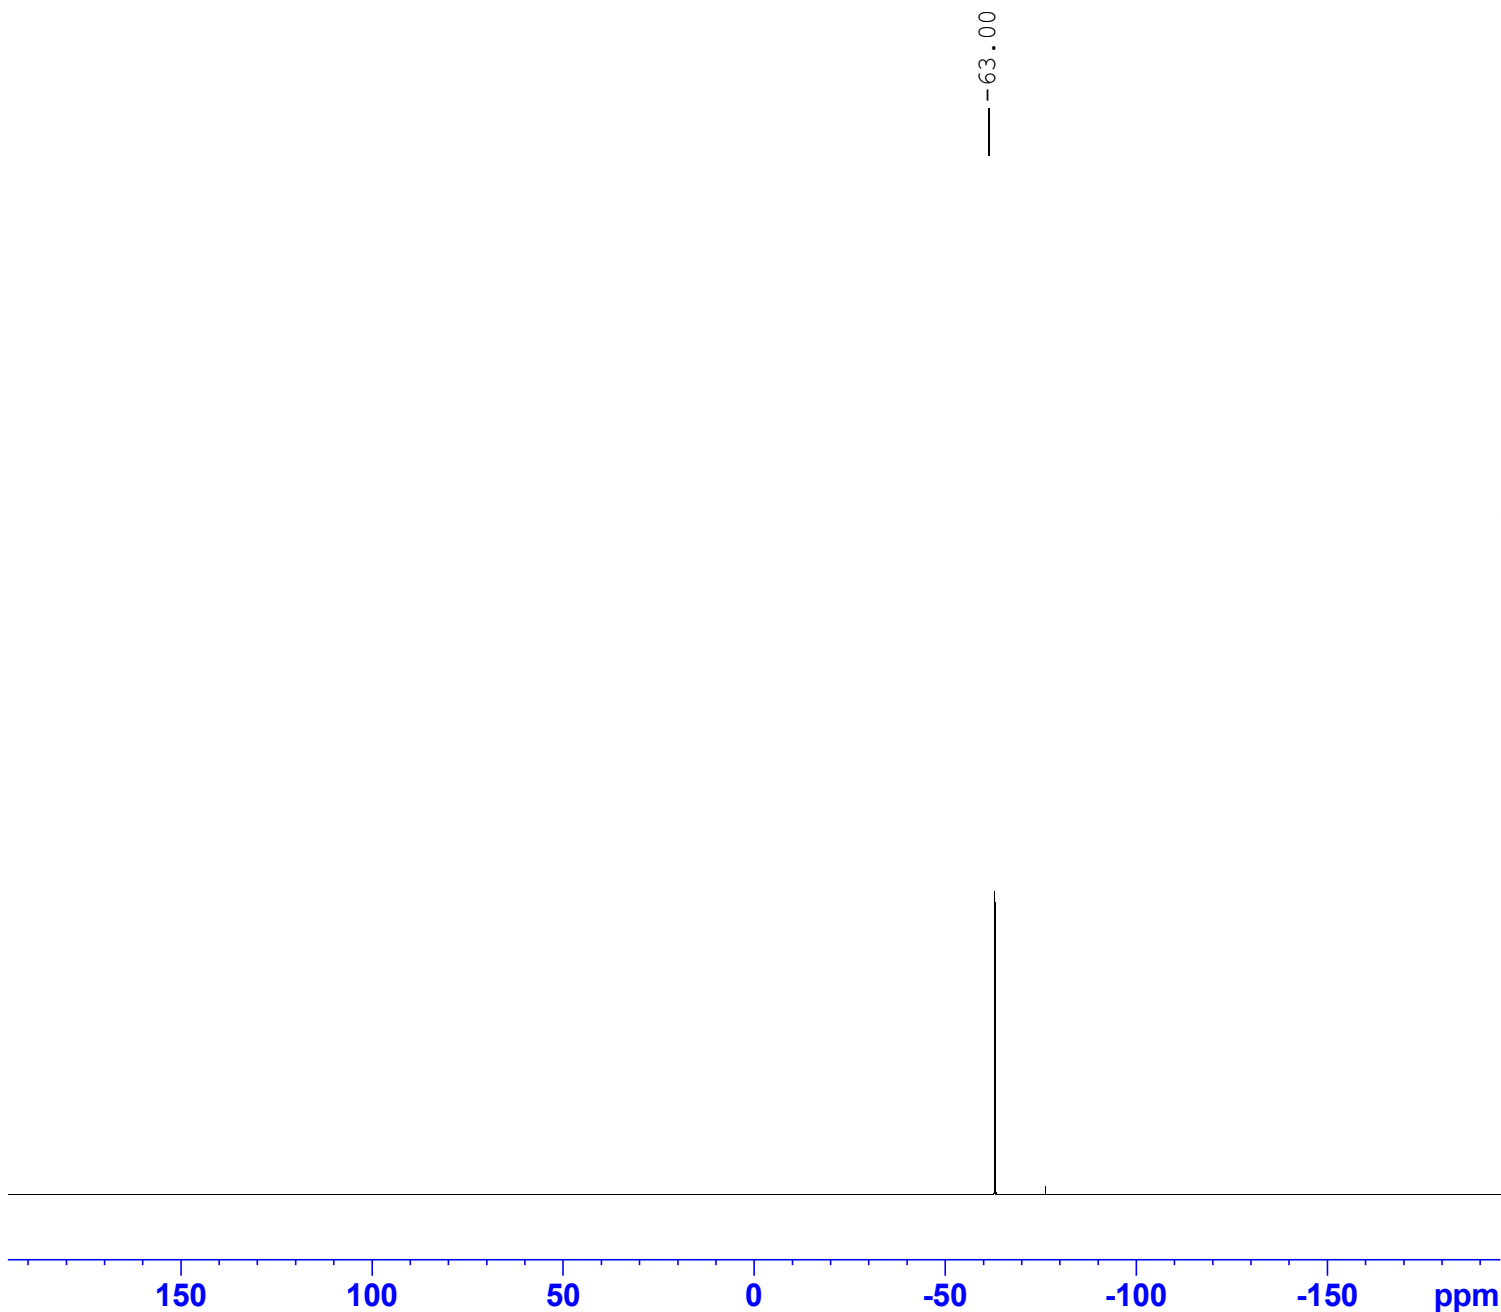

Figure S13 The  $^{19}\text{F}$  NMR (376.5 MHz,  $(\text{CD}_3)_2\text{CO}$ ) of compound **6b**.



Current Data Parameters  
 NAME Jul04-2022  
 EXPNO 12  
 PROCNO 1

F2 - Acquisition Parameters  
 Date\_ 20220705  
 Time\_ 9.19 h  
 INSTRUM AVNEO  
 PROBHD Z175272\_0008 (  
 PULPROG zg30  
 TD 131072  
 SOLVENT Acetone  
 NS 32  
 DS 2  
 SWH 8196.722 Hz  
 FIDRES 0.125072 Hz  
 AQ 7.9953918 sec  
 RG 101  
 DW 61.000 usec  
 DE 13.54 usec  
 TE 298.0 K  
 D1 1.00000000 sec  
 TD0 1  
 SFO1 400.1524709 MHz  
 NUC1 1H  
 P0 3.33 usec  
 P1 10.00 usec  
 PLW1 19.63299942 W

F2 - Processing parameters  
 SI 65536  
 SF 400.1500067 MHz  
 WDW EM  
 SSB 0  
 LB 0.30 Hz  
 GB 0  
 PC 1.00

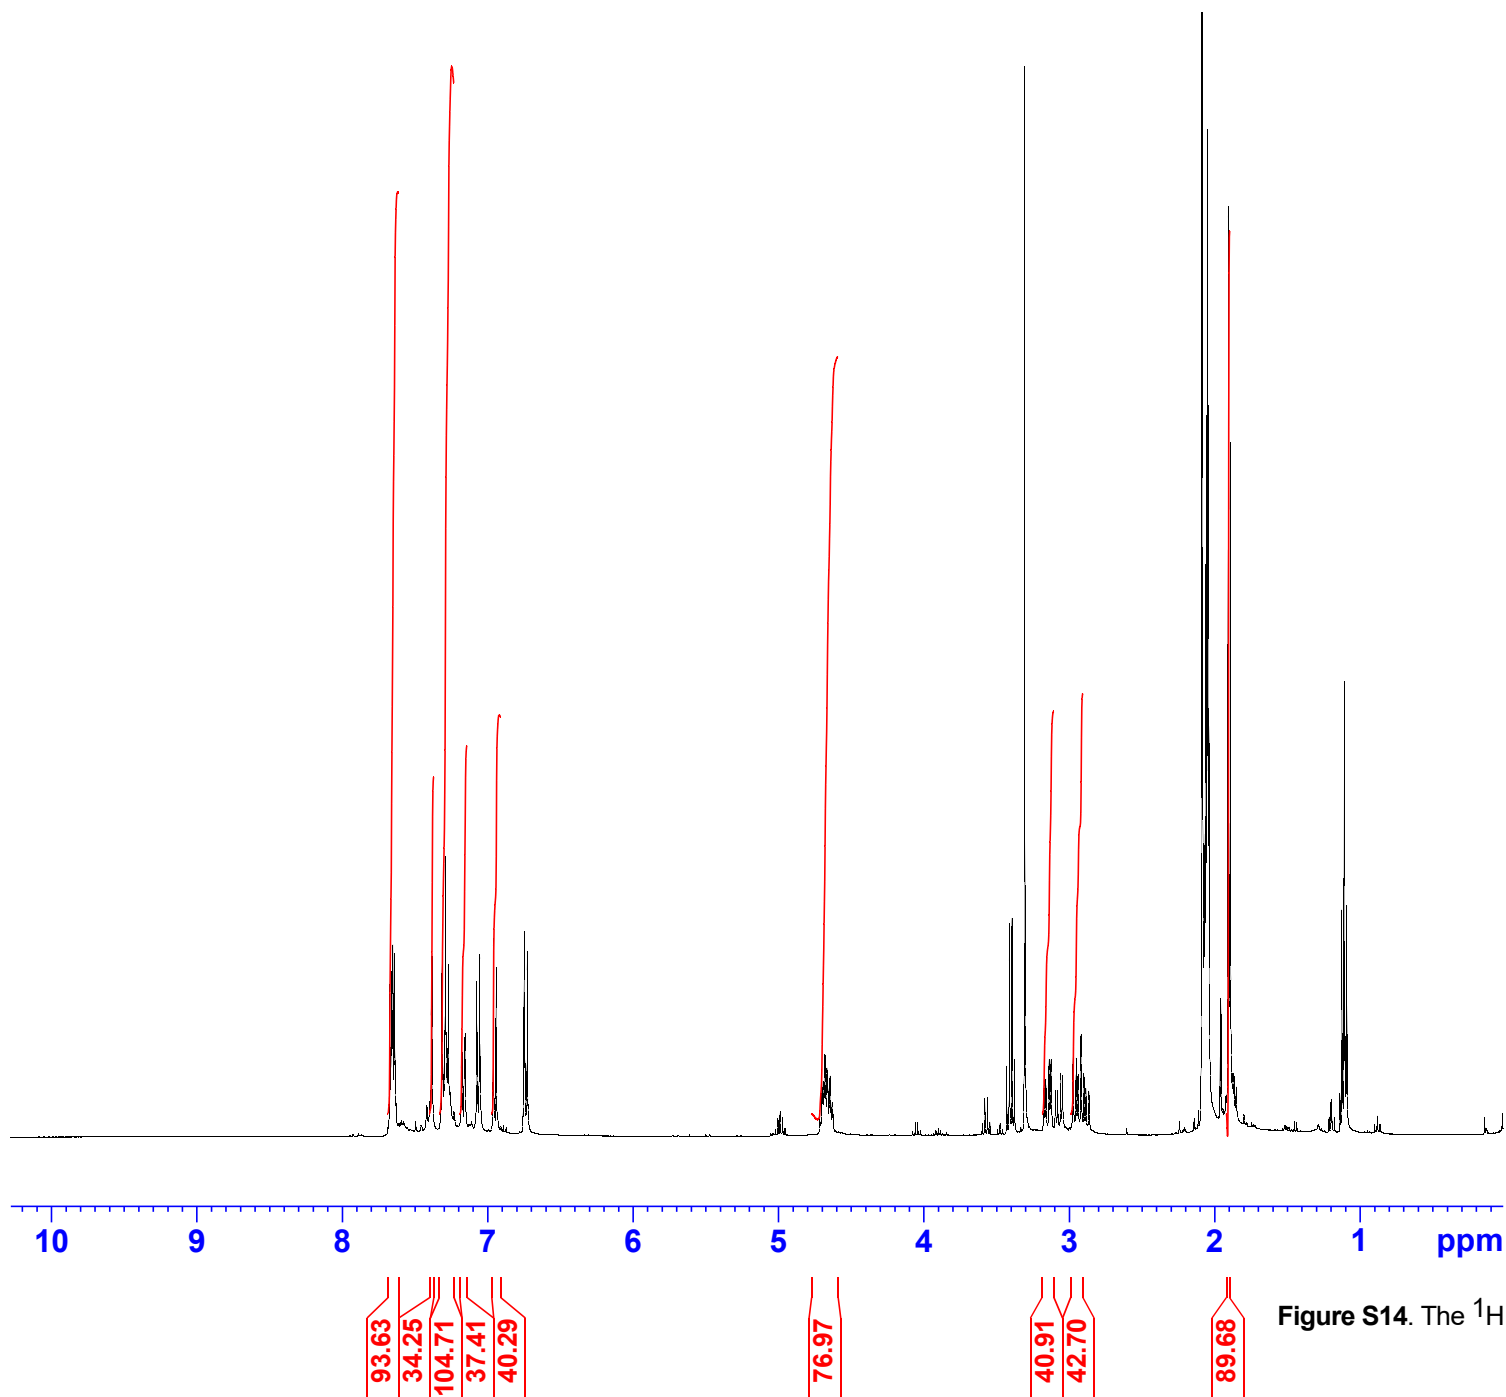

Figure S14. The  $^1\text{H}$  NMR (400 MHz,  $(\text{CD}_3)_2\text{CO}$ ) of compound **6c**



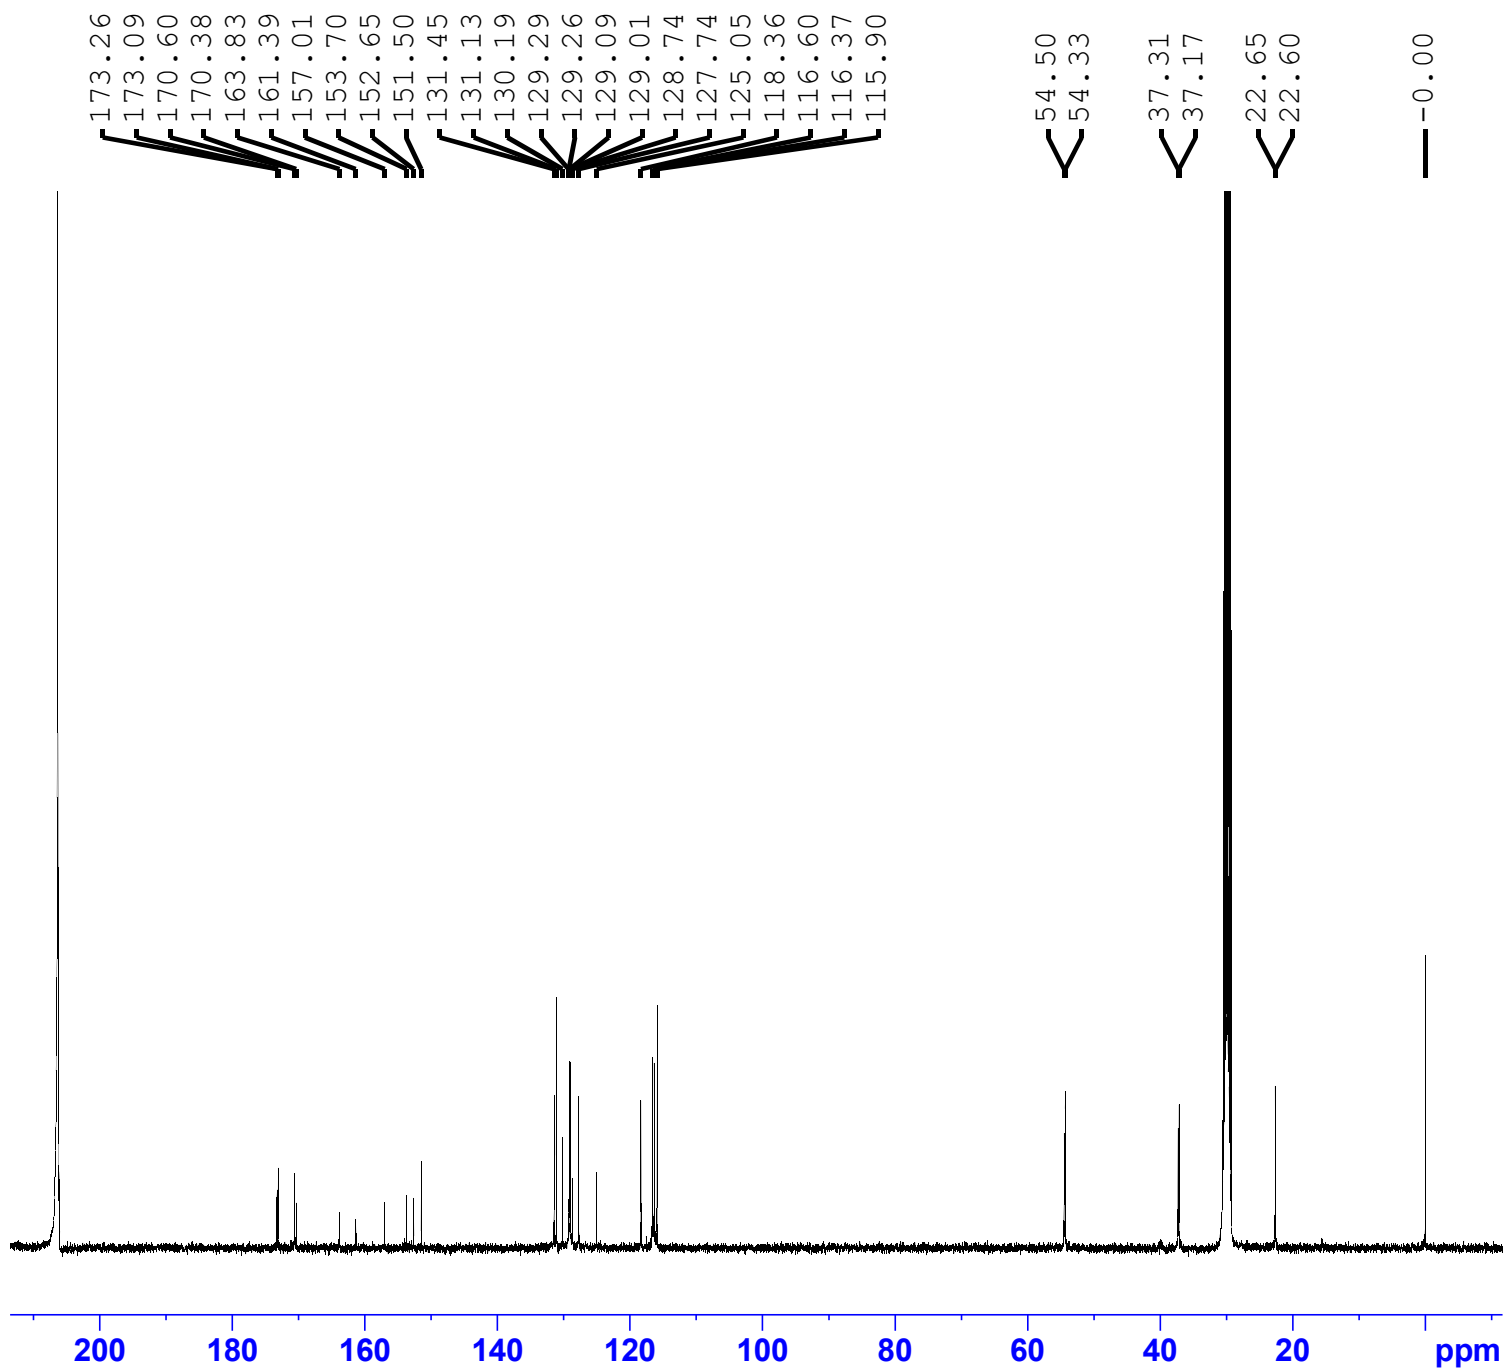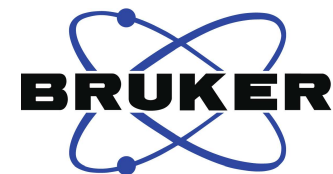

Current Data Parameters  
 NAME Aug22-2022  
 EXPNO 2  
 PROCNO 1

F2 - Acquisition Parameters  
 Date\_ 20220823  
 Time\_ 3.41 h  
 INSTRUM AVNEO  
 PROBHD Z175272\_0008 (  
 PULPROG zgpg30  
 TD 65536  
 SOLVENT H2O+D2O  
 NS 3000  
 DS 4  
 SWH 23809.523 Hz  
 FIDRES 0.726609 Hz  
 AQ 1.3762560 sec  
 RG 101  
 DW 21.000 usec  
 DE 6.50 usec  
 TE 298.0 K  
 D1 2.00000000 sec  
 D11 0.03000000 sec  
 TD0 1  
 SFO1 100.6278593 MHz  
 NUC1 13C  
 P0 3.33 usec  
 P1 10.00 usec  
 PLW1 58.38199997 W  
 SFO2 400.1516006 MHz  
 NUC2 1H  
 CPDPRG[2] waltz65  
 PCPD2 90.00 usec  
 PLW2 19.63299942 W  
 PLW12 0.24237999 W  
 PLW13 0.12192000 W

F2 - Processing parameters  
 SI 32768  
 SF 100.6179757 MHz  
 WDW EM  
 SSB 0  
 LB 1.00 Hz  
 GB 0  
 PC 1.40

-76.35  
-76.36  
-115.06



Current Data Parameters  
NAME Jul04-2022  
EXPNO 14  
PROCNO 1

F2 - Acquisition Parameters  
Date\_ 20220706  
Time\_ 1.49 h  
INSTRUM AVNEO  
PROBHD Z175272\_0008 (  
PULPROG zg  
TD 131072  
SOLVENT Acetone  
NS 128  
DS 4  
SWH 147058.828 Hz  
FIDRES 2.243940 Hz  
AQ 0.4456448 sec  
RG 101  
DW 3.400 usec  
DE 6.50 usec  
TE 298.0 K  
D1 1.00000000 sec  
TD0 1  
SFO1 376.5171850 MHz  
NUC1 19F  
P1 12.00 usec  
PLW1 45.00000000 W

F2 - Processing parameters  
SI 65536  
SF 376.5171957 MHz  
WDW EM  
SSB 0  
LB 0.30 Hz  
GB 0  
PC 1.00

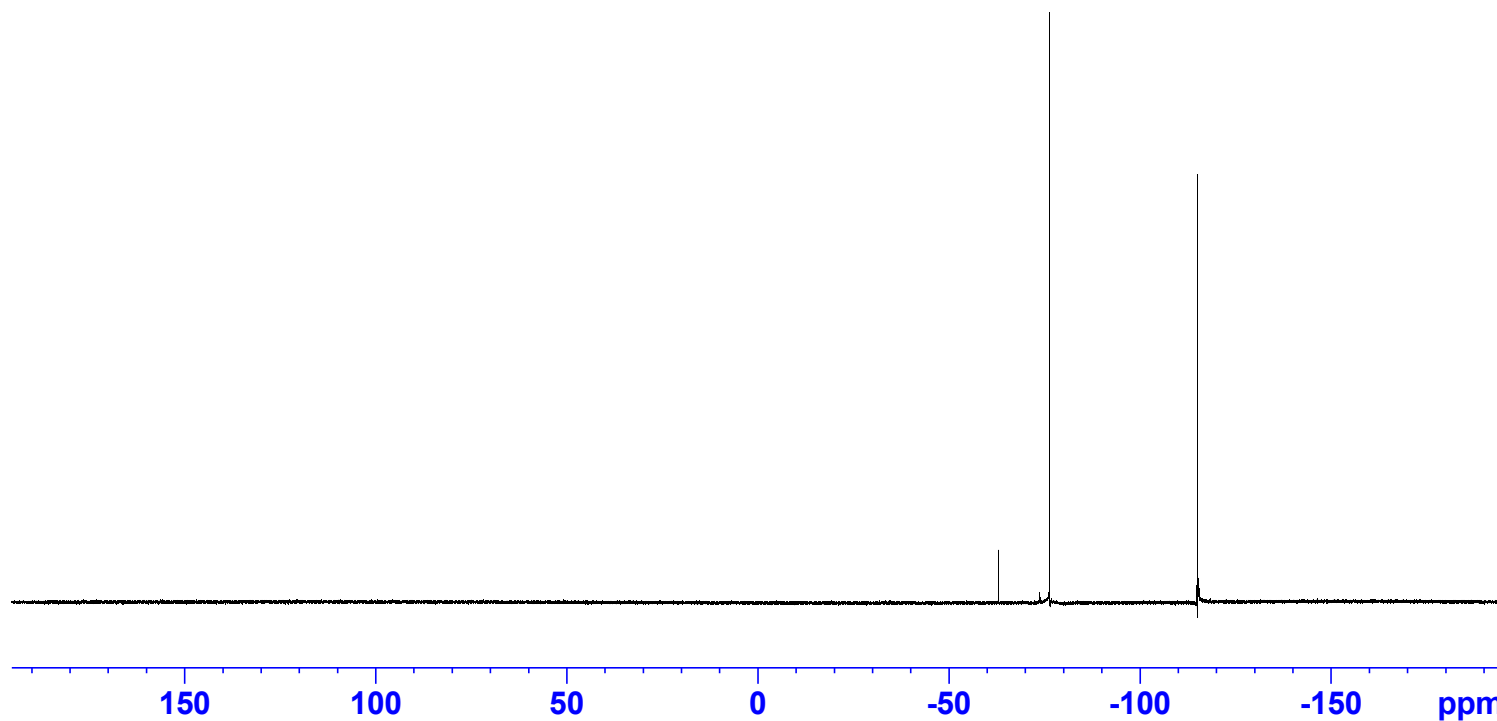

Figure S16. The  $^{19}\text{F}$  NMR (376.5 MHz,  $(\text{CD}_3)_2\text{CO}$ ) of compound **6c**

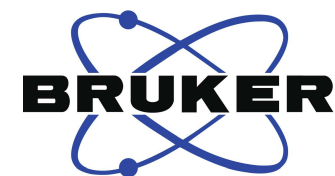

Current Data Parameters  
NAME Jul04-2022  
EXPNO 10  
PROCNO 1

F2 - Acquisition Parameters  
Date\_ 20220705  
Time\_ 9.08 h  
INSTRUM AVNEO  
PROBHD Z175272\_0008 (  
PULPROG zg30  
TD 131072  
SOLVENT Acetone  
NS 32  
DS 2  
SWH 8196.722 Hz  
FIDRES 0.125072 Hz  
AQ 7.9953918 sec  
RG 101  
DW 61.000 usec  
DE 13.54 usec  
TE 298.0 K  
D1 1.00000000 sec  
TD0 1  
SFO1 400.1524709 MHz  
NUC1 1H  
P0 3.33 usec  
P1 10.00 usec  
PLW1 19.63299942 W

F2 - Processing parameters  
SI 65536  
SF 400.1500067 MHz  
WDW EM  
SSB 0  
LB 0.30 Hz  
GB 0  
PC 1.00

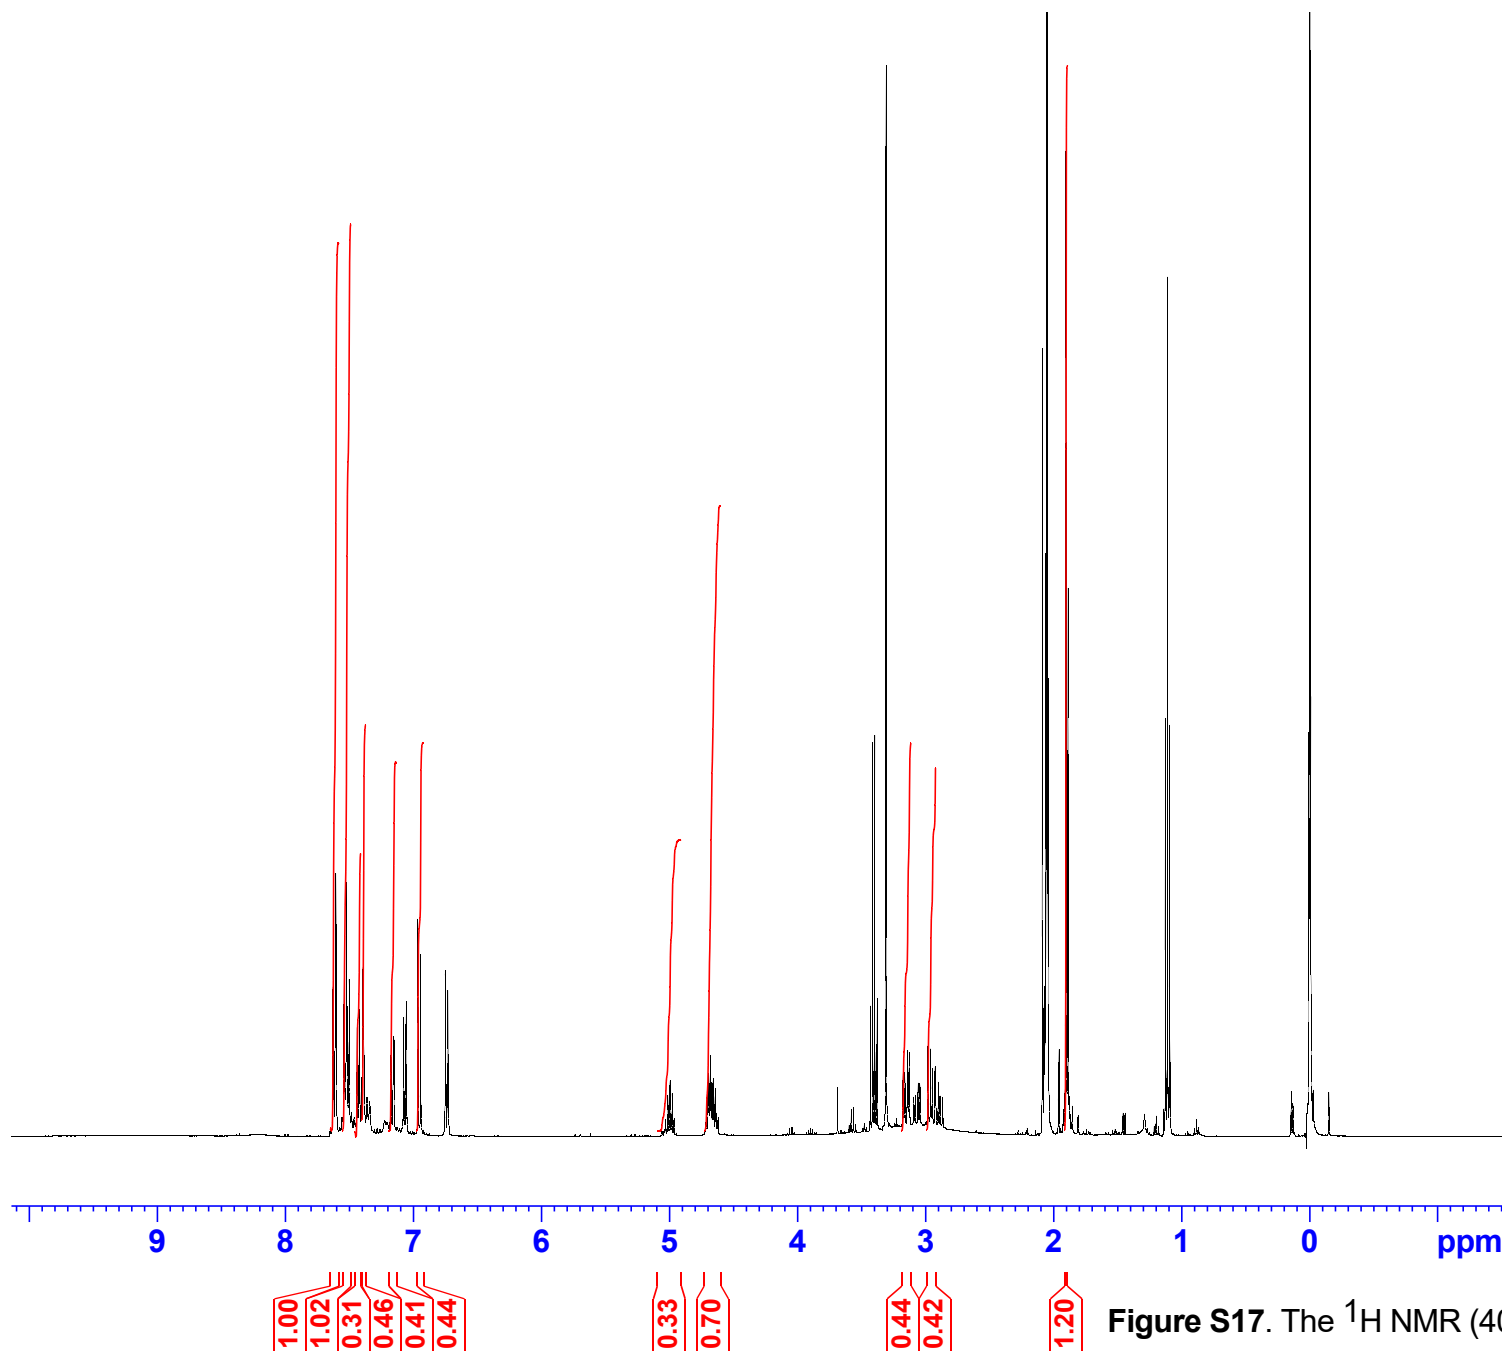

Figure S17. The  $^1\text{H}$  NMR (400 MHz,  $(\text{CD}_3)_2\text{CO}$ ) of compound **6d**

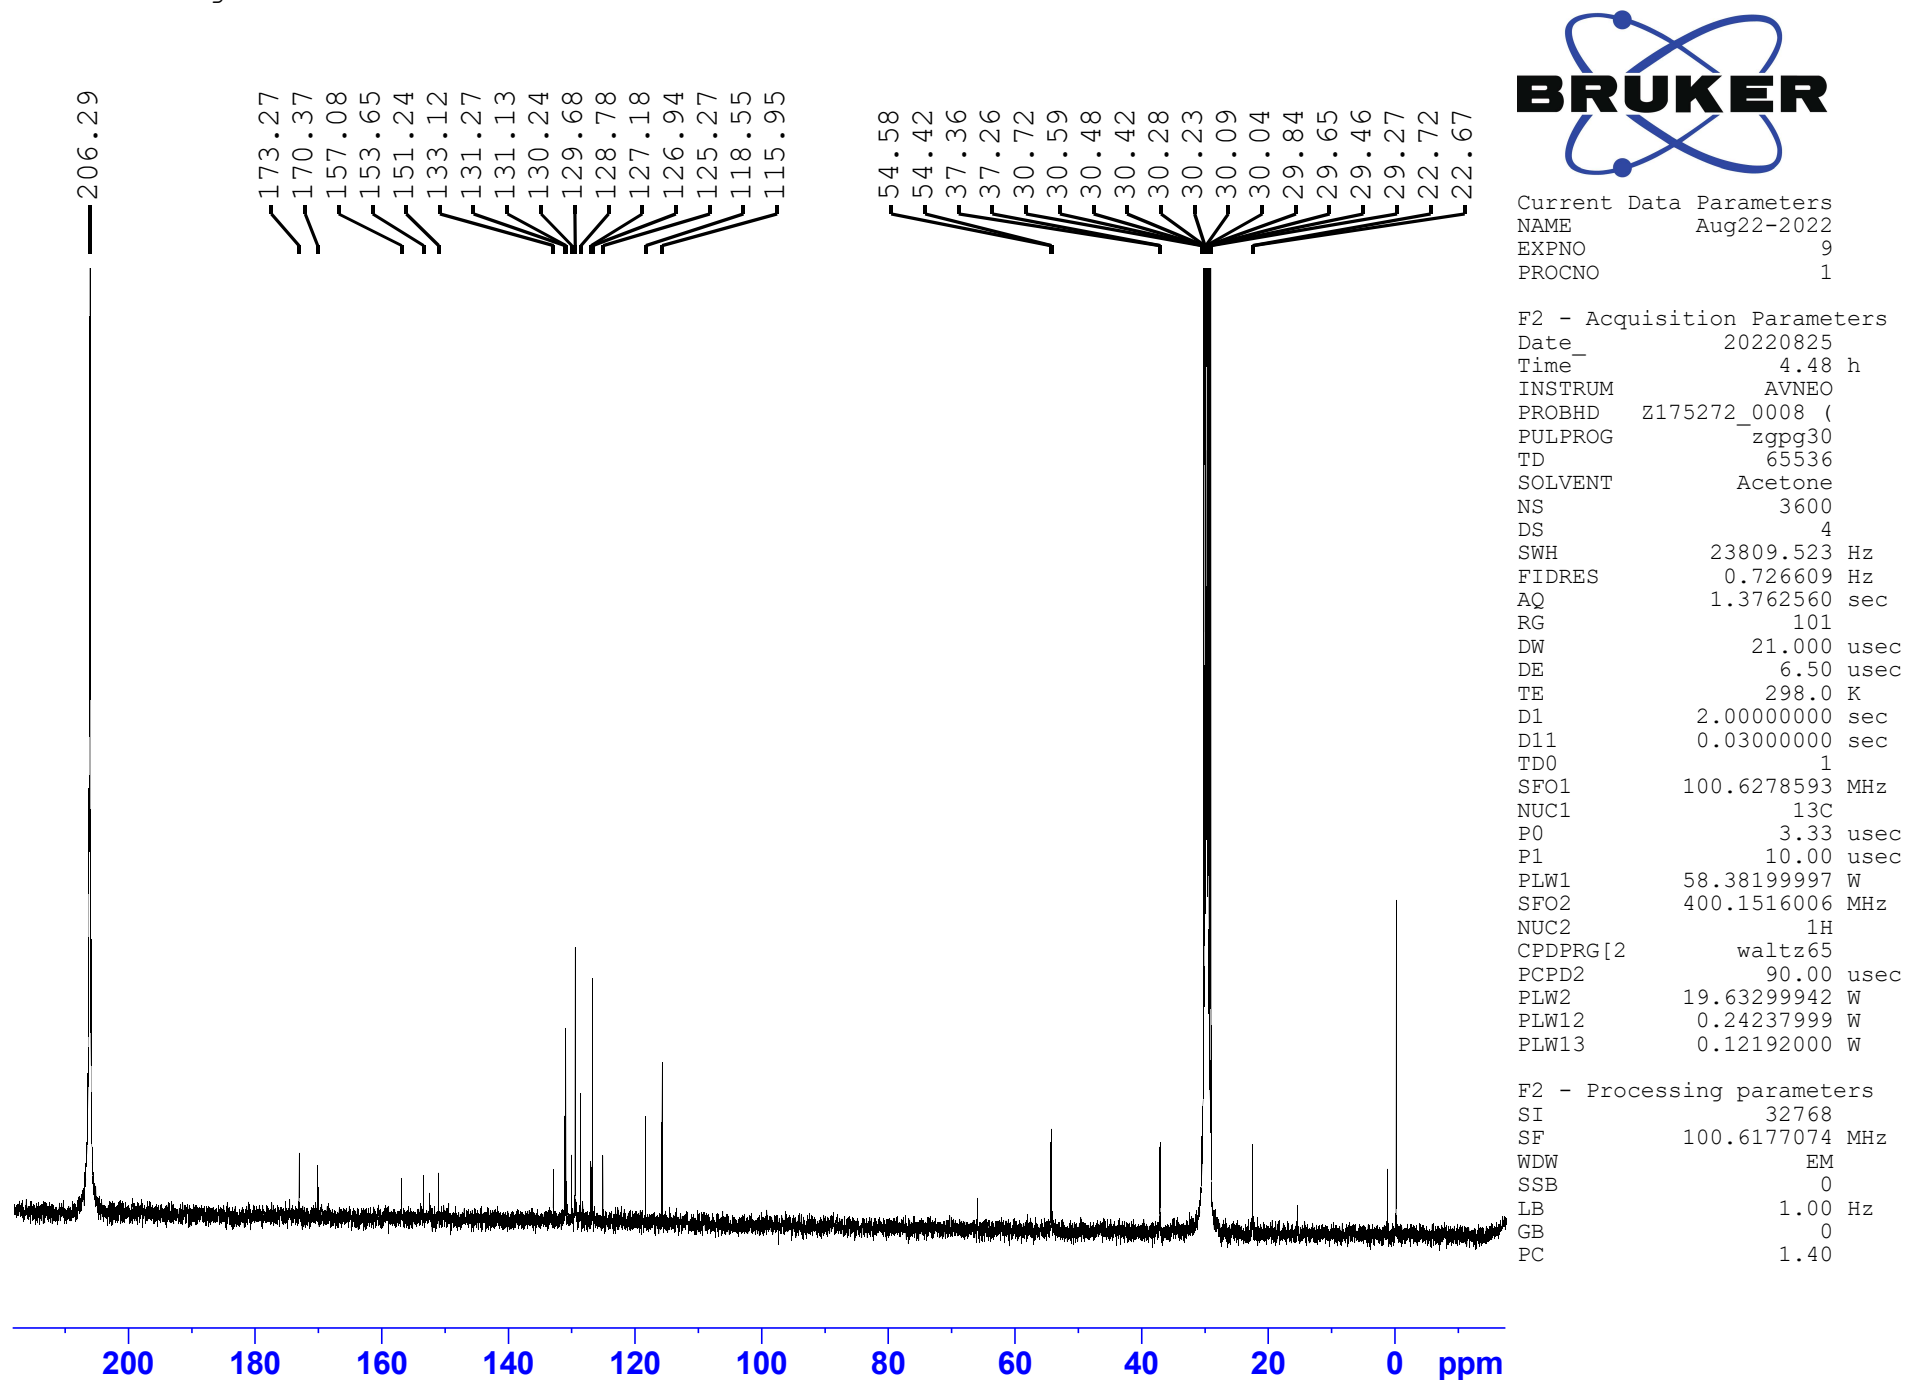Figure S18. The  $^{13}\text{C}$  NMR (100.6 MHz,  $(\text{CD}_3)_2\text{CO}$ ) of compound **6d**



Current Data Parameters  
NAME Jul04-2022  
EXPNO 8  
PROCNO 1

F2 - Acquisition Parameters  
Date\_ 20220705  
Time\_ 19.13 h  
INSTRUM AVNEO  
PROBHD Z175272\_0008 (  
PULPROG zg30  
TD 131072  
SOLVENT Acetone  
NS 32  
DS 2  
SWH 8196.722 Hz  
FIDRES 0.125072 Hz  
AQ 7.9953918 sec  
RG 71.8  
DW 61.000 usec  
DE 13.54 usec  
TE 298.0 K  
D1 1.00000000 sec  
TD0 1  
SFO1 400.1524709 MHz  
NUC1 1H  
P0 3.33 usec  
P1 10.00 usec  
PLW1 19.63299942 W

F2 - Processing parameters  
SI 65536  
SF 400.1500067 MHz  
WDW EM  
SSB 0  
LB 0.30 Hz  
GB 0  
PC 1.00

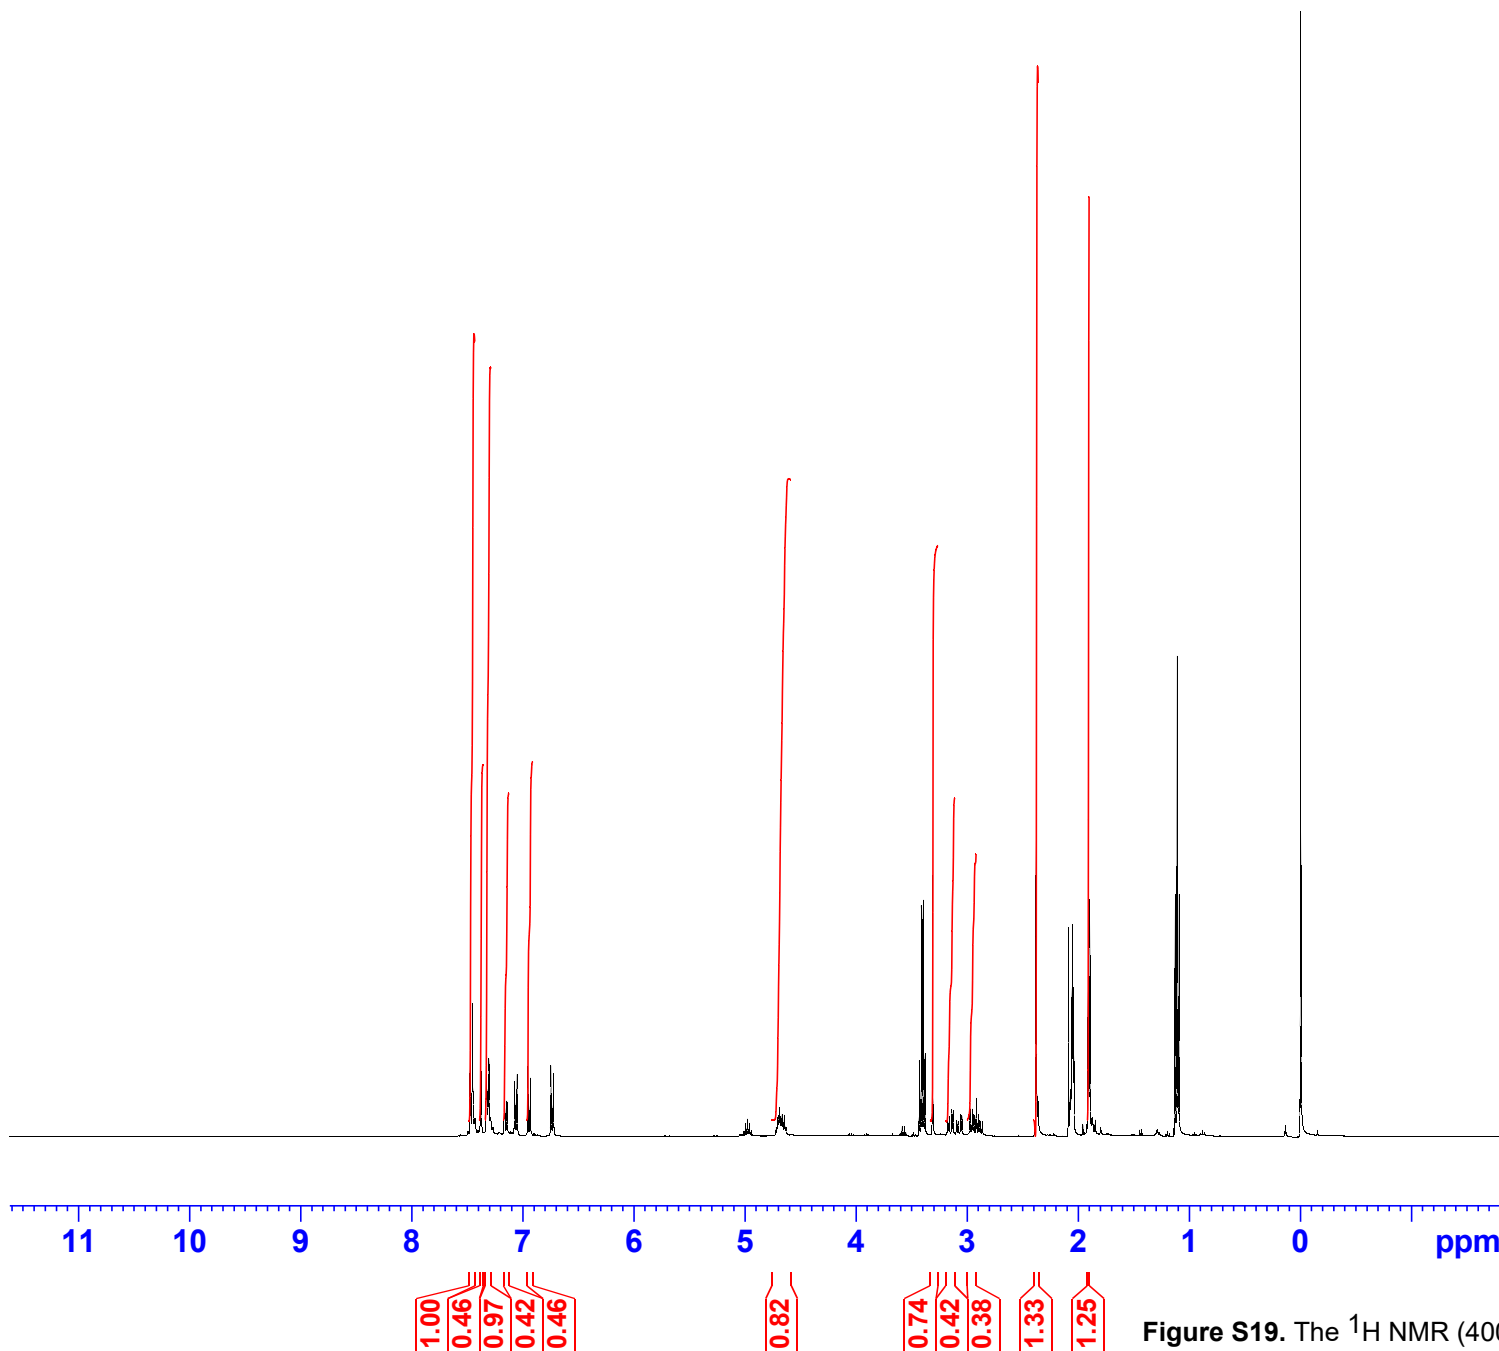

Figure S19. The  $^1\text{H}$  NMR (400 MHz,  $(\text{CD}_3)_2\text{CO}$ ) of compound **6e**

CH3 PTAD Conj.

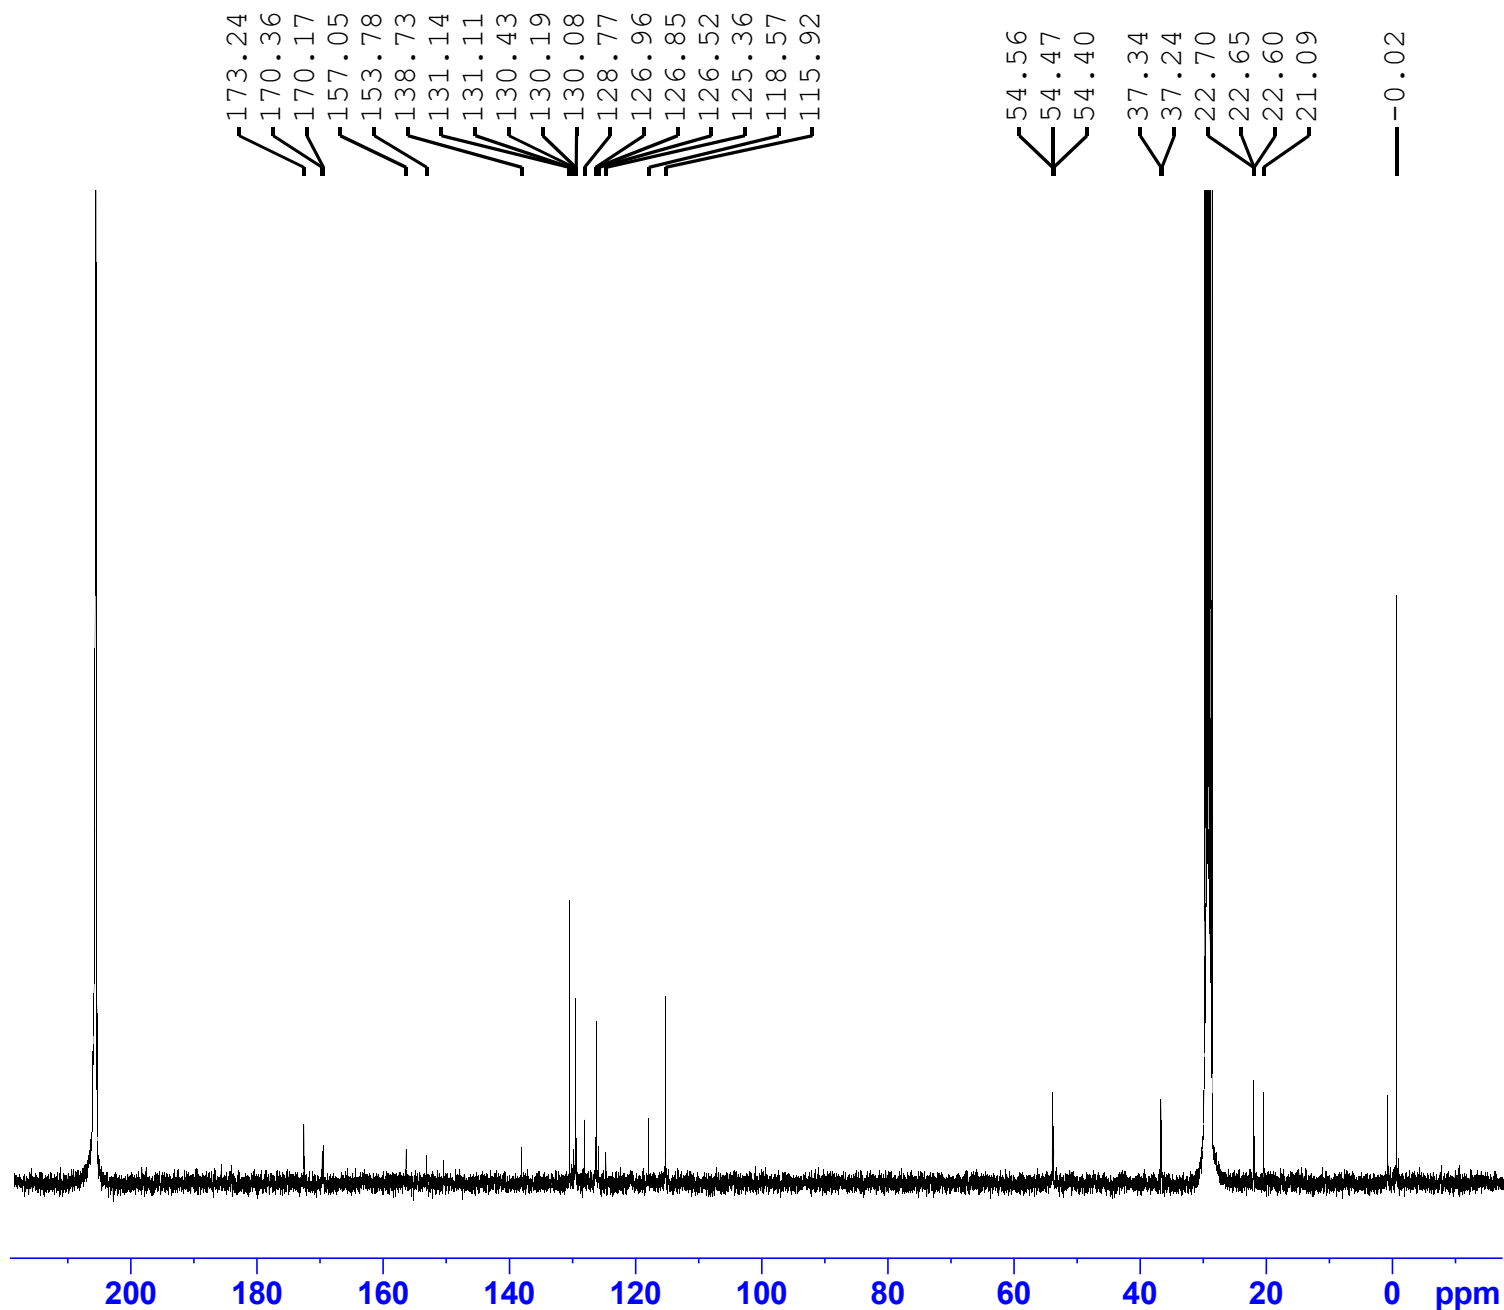

Current Data Parameters  
 NAME Aug22-2022  
 EXPNO 4  
 PROCNO 1

F2 - Acquisition Parameters  
 Date\_ 20220823  
 Time\_ 21.59 h  
 INSTRUM AVNEO  
 PROBHD Z175272\_0008 (  
 PULPROG zgpg30  
 TD 65536  
 SOLVENT Acetone  
 NS 3000  
 DS 4  
 SWH 23809.523 Hz  
 FIDRES 0.726609 Hz  
 AQ 1.3762560 sec  
 RG 101  
 DW 21.000 usec  
 DE 6.50 usec  
 TE 298.0 K  
 D1 2.00000000 sec  
 D11 0.03000000 sec  
 TD0 1  
 SFO1 100.6278593 MHz  
 NUC1 13C  
 P0 3.33 usec  
 P1 10.00 usec  
 PLW1 58.38199997 W  
 SFO2 400.1516006 MHz  
 NUC2 1H  
 CPDPRG[2] waltz65  
 PCPD2 90.00 usec  
 PLW2 19.63299942 W  
 PLW12 0.24237999 W  
 PLW13 0.12192000 W

F2 - Processing parameters  
 SI 32768  
 SF 100.6177093 MHz  
 WDW EM  
 SSB 0  
 LB 1.00 Hz  
 GB 0  
 PC 1.40

Figure S20. The  $^{13}\text{C}$  NMR (100.6 MHz,  $(\text{CD}_3)_2\text{CO}$ ) of compound **6e**



Current Data Parameters  
 NAME Jul04-2022  
 EXPNO 6  
 PROCNO 1

F2 - Acquisition Parameters  
 Date\_ 20220705  
 Time\_ 8.44 h  
 INSTRUM AVNEO  
 PROBHD Z175272\_0008 (  
 PULPROG zg30  
 TD 131072  
 SOLVENT Acetone  
 NS 32  
 DS 2  
 SWH 8196.722 Hz  
 FIDRES 0.125072 Hz  
 AQ 7.9953918 sec  
 RG 101  
 DW 61.000 usec  
 DE 13.54 usec  
 TE 298.0 K  
 D1 1.00000000 sec  
 TD0 1  
 SFO1 400.1524709 MHz  
 NUC1 1H  
 P0 3.33 usec  
 P1 10.00 usec  
 PLW1 19.63299942 W

F2 - Processing parameters  
 SI 65536  
 SF 400.1500067 MHz  
 WDW EM  
 SSB 0  
 LB 0.30 Hz  
 GB 0  
 PC 1.00

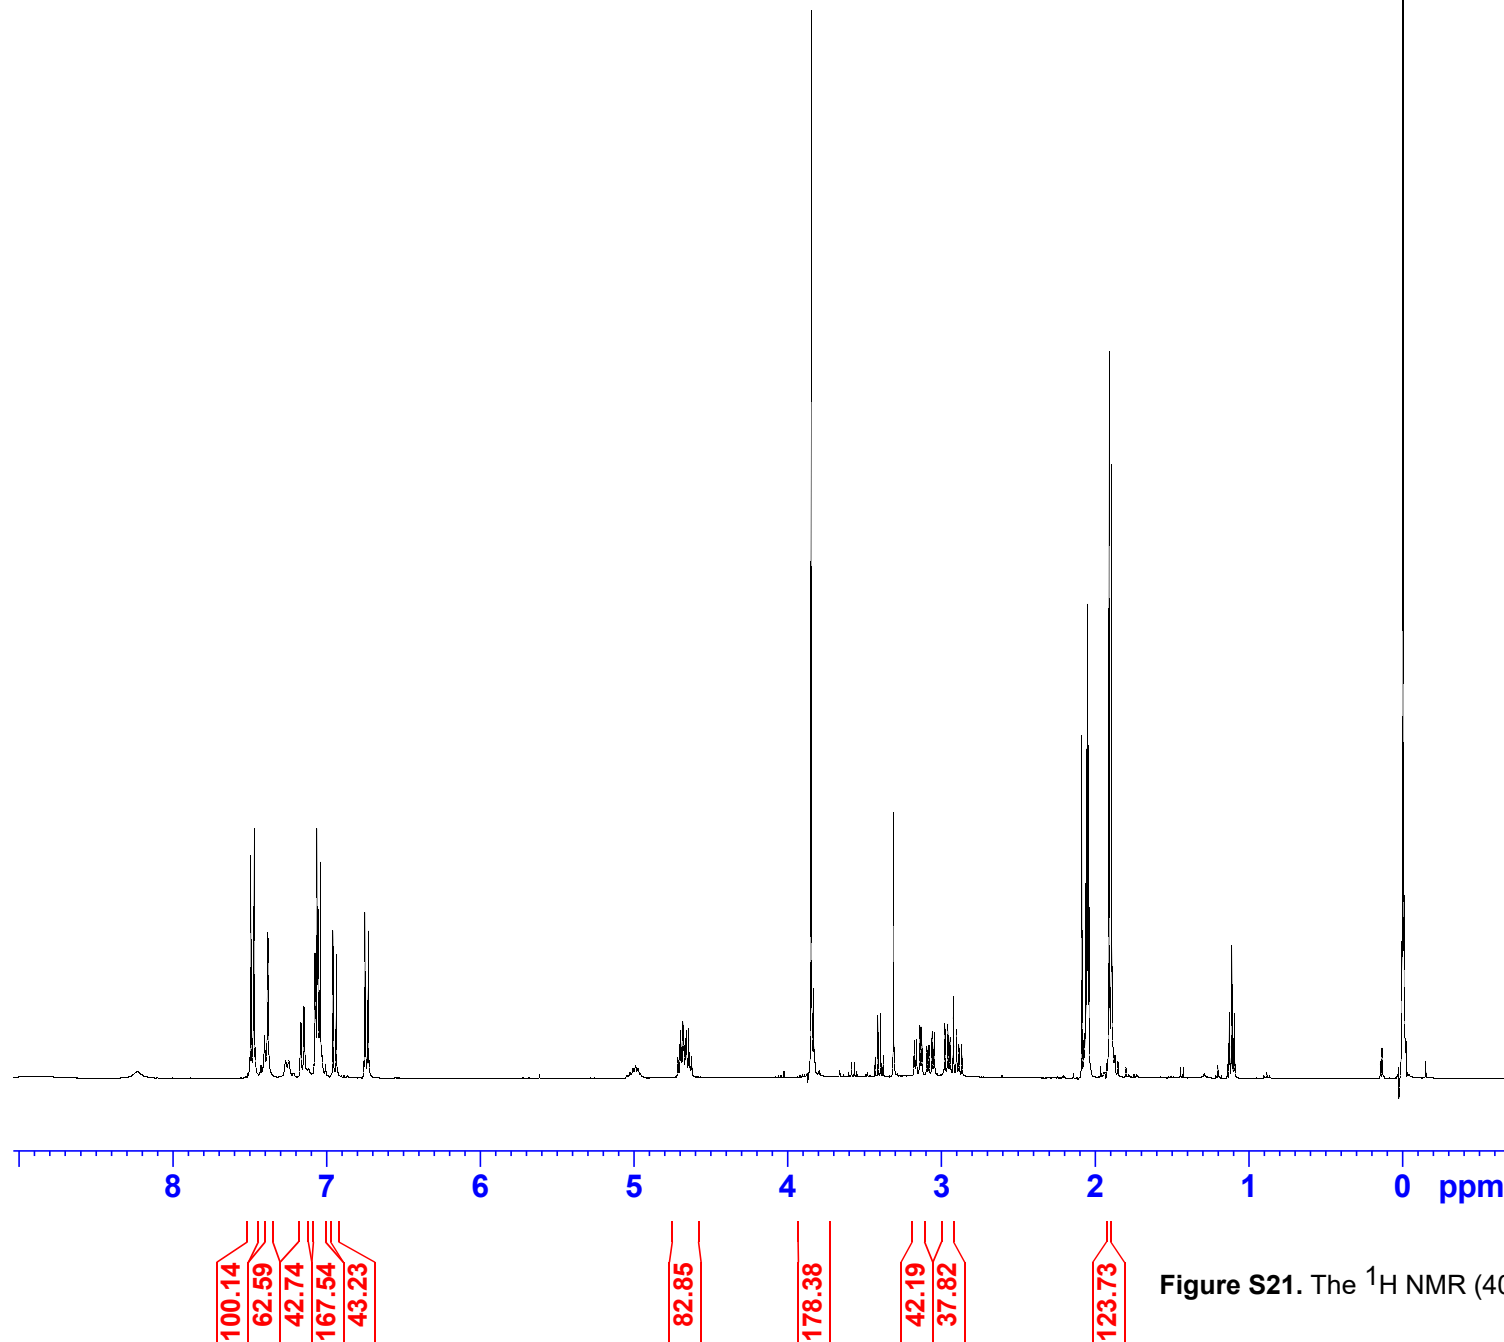

Figure S21. The  $^1\text{H}$  NMR (400 MHz,  $(\text{CD}_3)_2\text{CO}$ ) of compound **6f**

CH3 PTAD Conj.



Current Data Parameters  
 NAME Aug22-2022  
 EXPNO 4  
 PROCNO 1

F2 - Acquisition Parameters  
 Date\_ 20220823  
 Time\_ 21.59 h  
 INSTRUM AVNEO  
 PROBHD Z175272\_0008 (  
 PULPROG zgpg30  
 TD 65536  
 SOLVENT Acetone  
 NS 3000  
 DS 4  
 SWH 23809.523 Hz  
 FIDRES 0.726609 Hz  
 AQ 1.3762560 sec  
 RG 101  
 DW 21.000 usec  
 DE 6.50 usec  
 TE 298.0 K  
 D1 2.00000000 sec  
 D11 0.03000000 sec  
 TD0 1  
 SFO1 100.6278593 MHz  
 NUC1 13C  
 P0 3.33 usec  
 P1 10.00 usec  
 PLW1 58.38199997 W  
 SFO2 400.1516006 MHz  
 NUC2 1H  
 CPDPRG[2] waltz65  
 PCPD2 90.00 usec  
 PLW2 19.63299942 W  
 PLW12 0.24237999 W  
 PLW13 0.12192000 W

F2 - Processing parameters  
 SI 32768  
 SF 100.6177093 MHz  
 WDW EM  
 SSB 0  
 LB 1.00 Hz  
 GB 0  
 PC 1.40

Figure S22. The  $^{13}\text{C}$  NMR (100.6 MHz,  $(\text{CD}_3)_2\text{CO}$ ) of compound **6e**
